# Supplementary material for: A novel polypeptide CAPG-171aa encoded by circCAPG plays a critical role in triple-negative breast cancer
Source: PubMed Central journal article supplement (PMC10320902; doi:10.1186/s12943-023-01806-x), 2023-07-05

**Fig. 1B**

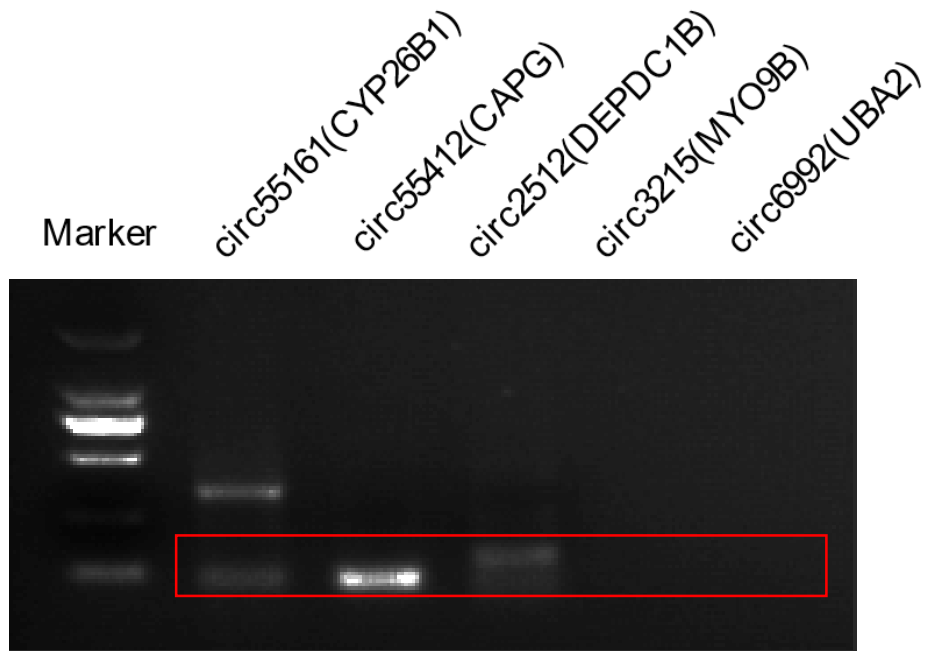

**Fig. 1F**

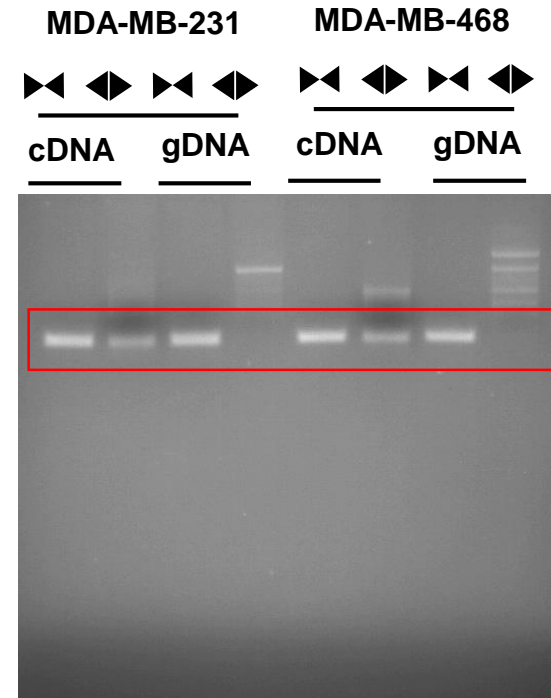

**Fig. 2D**

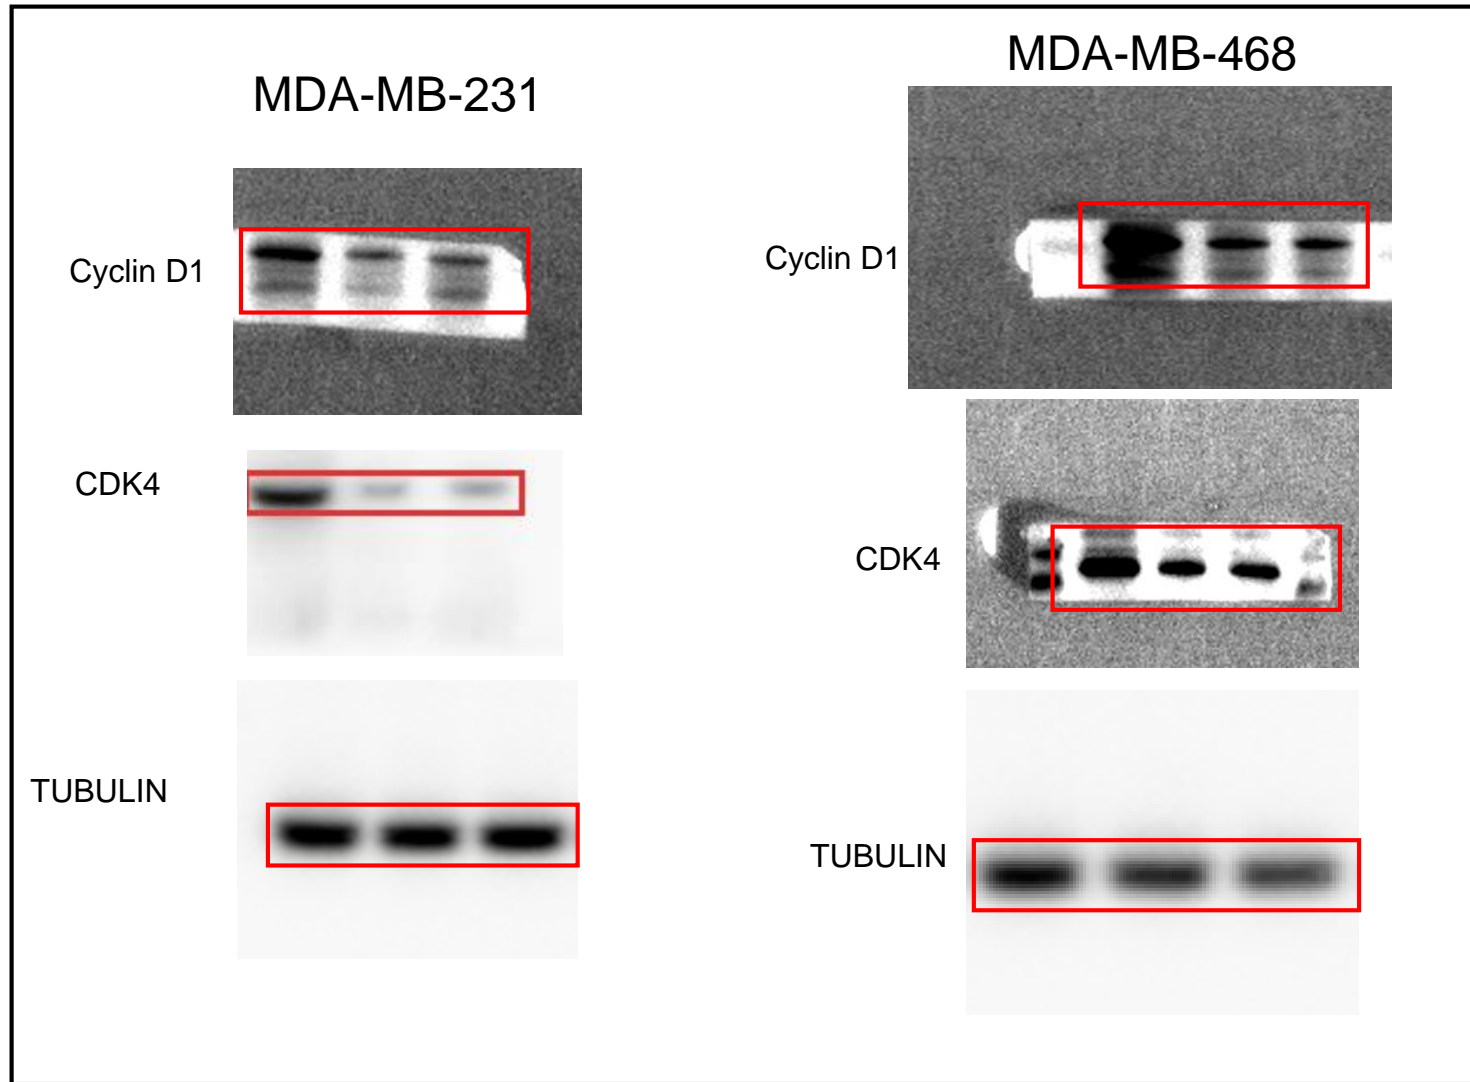

**Fig. 3D**

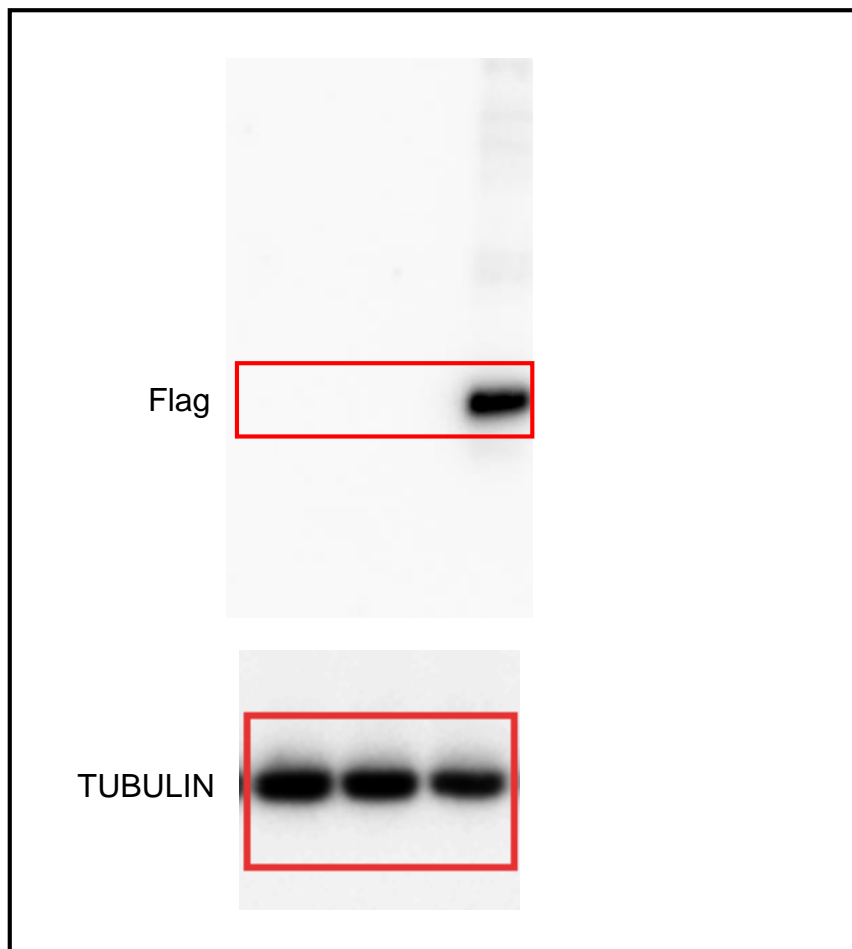

**Fig. 3E**

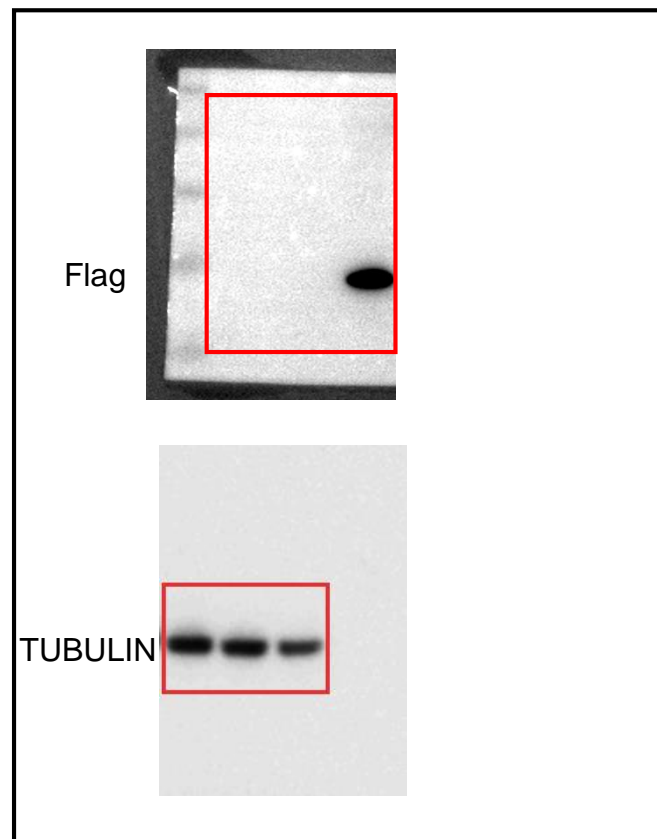

**Fig. 4E**

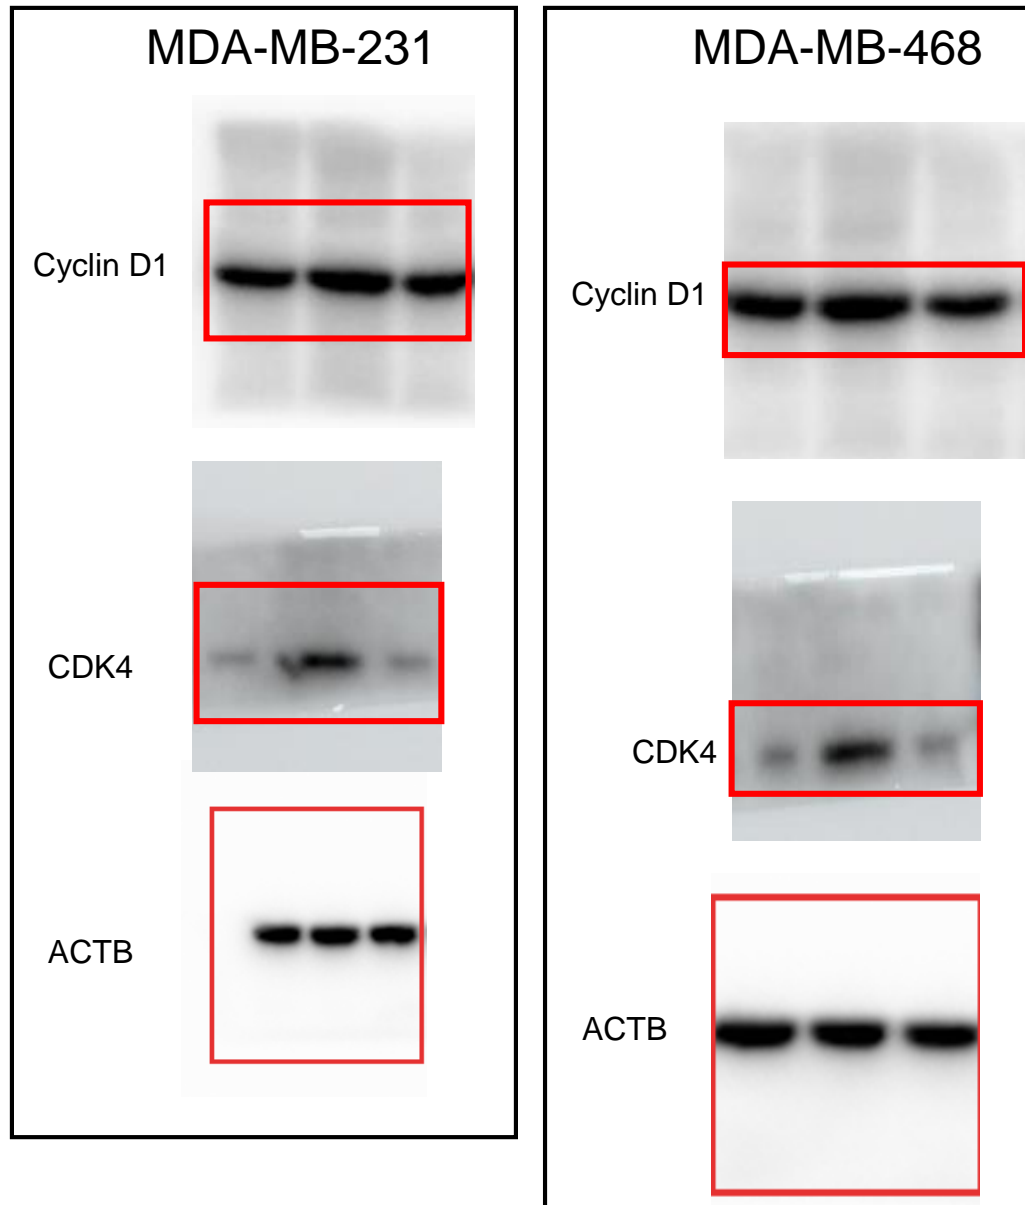

**Fig. 5B**

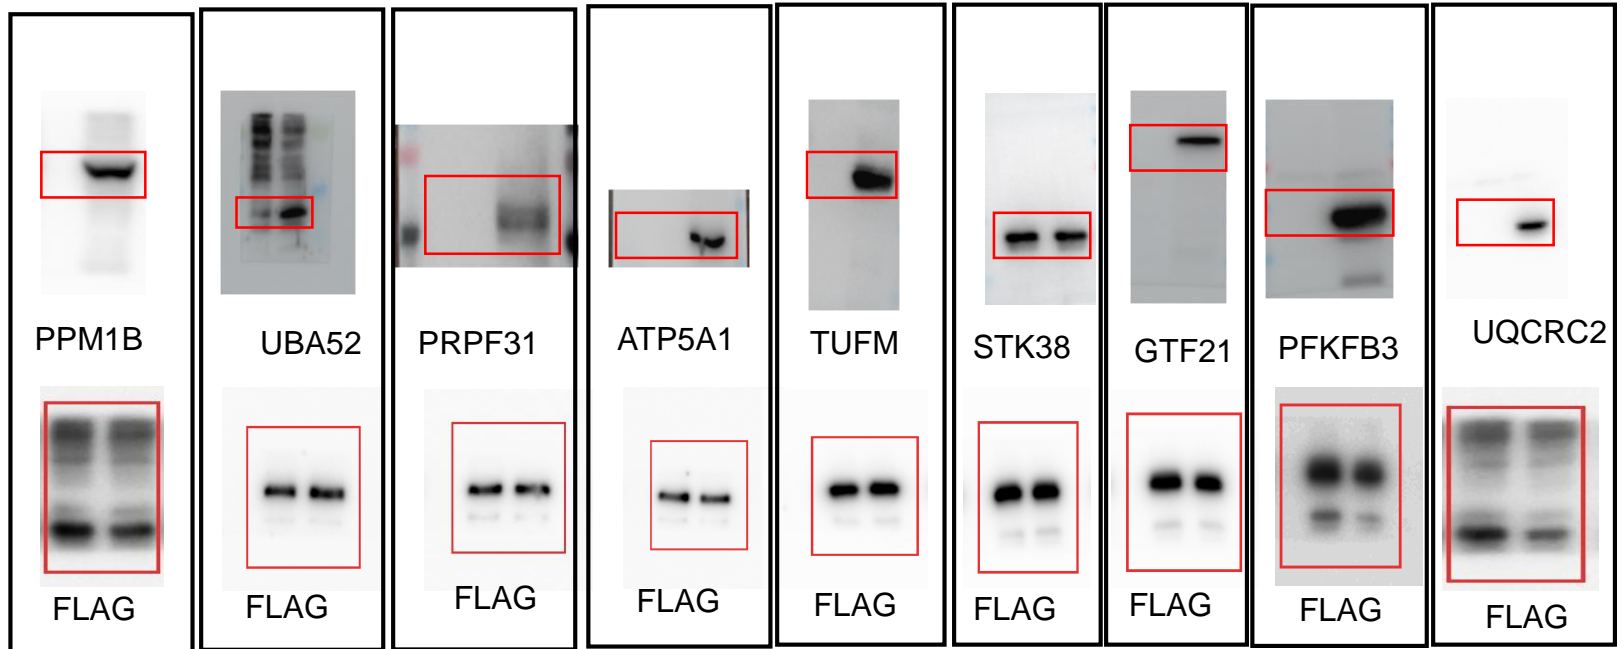

**Fig. 5C**

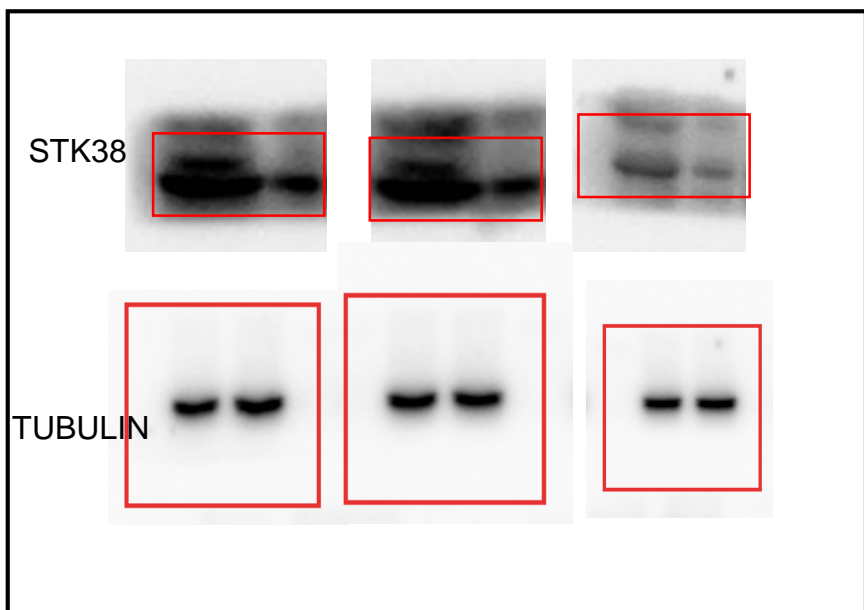

**Fig. 5G**

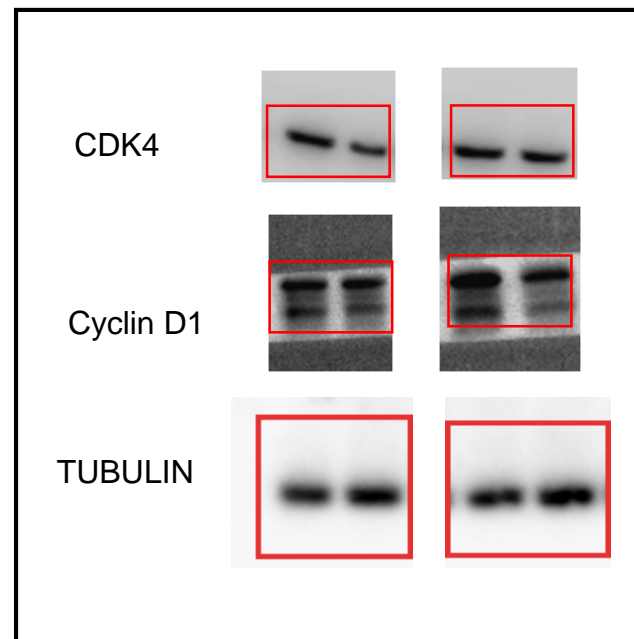

**Fig. 6A**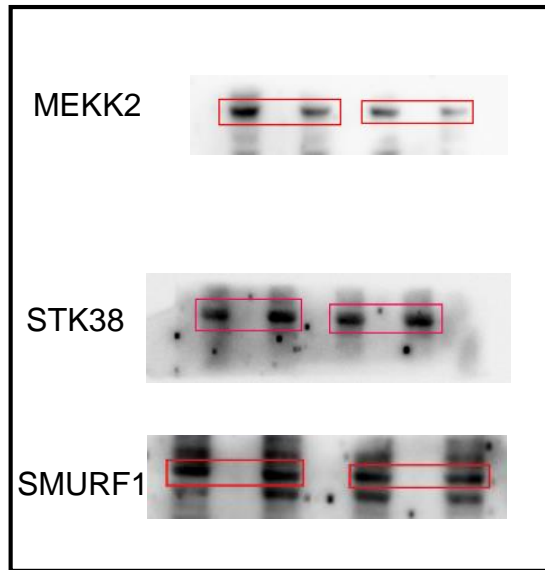**Fig. 6B**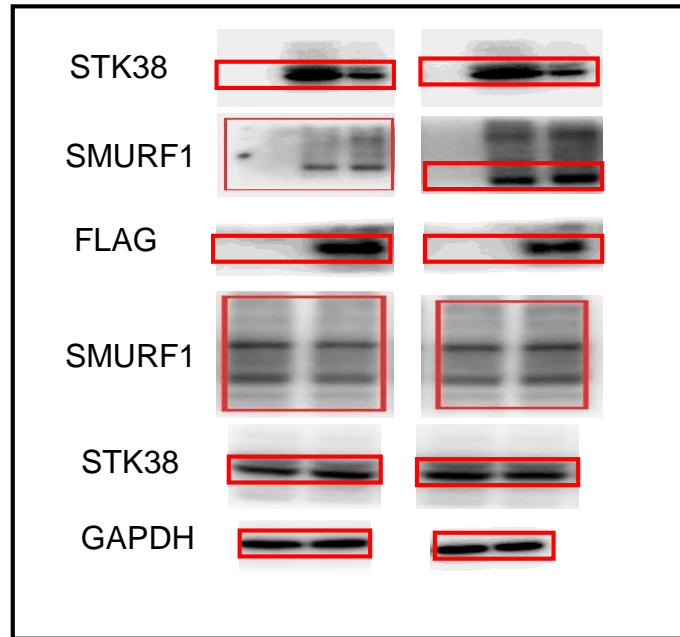**Fig. 6C**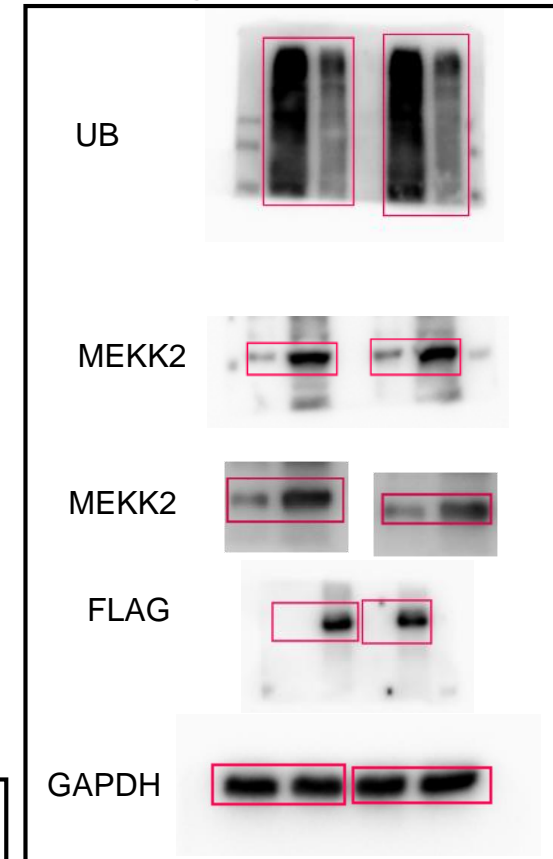**Fig. 6D**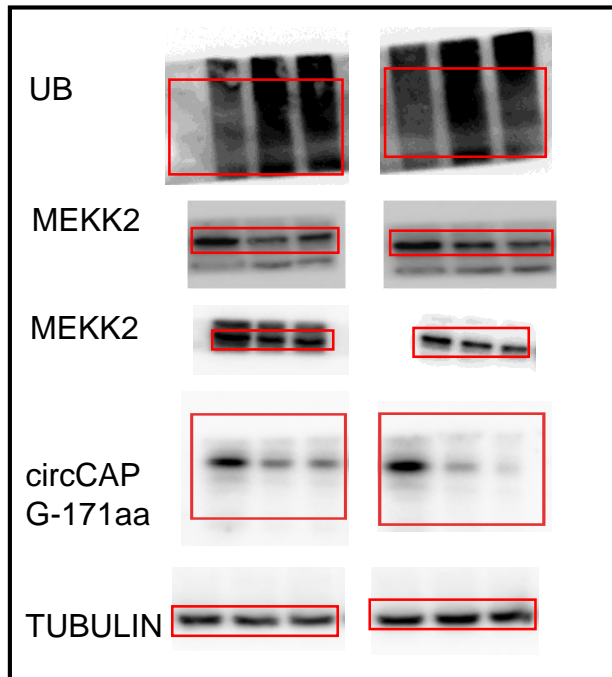**Fig. 6E**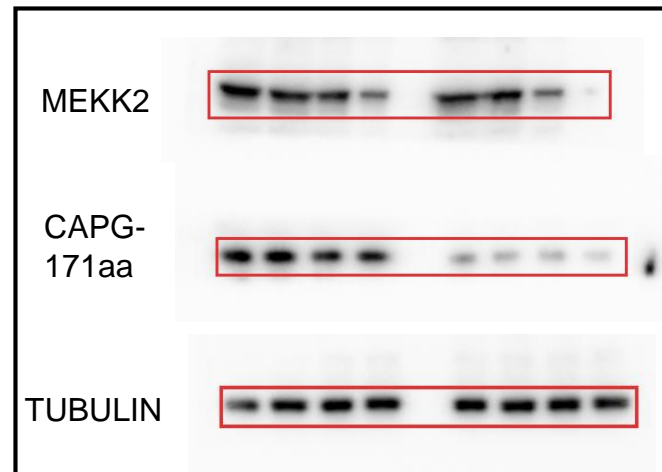

**Fig. 6F**

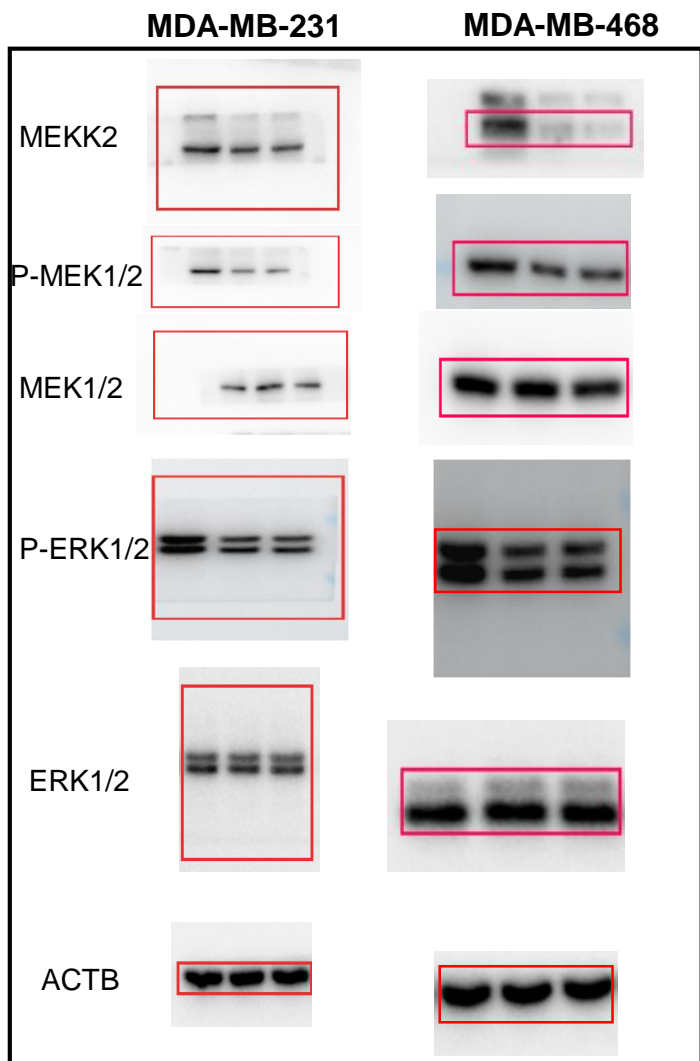

**Fig. 6G**

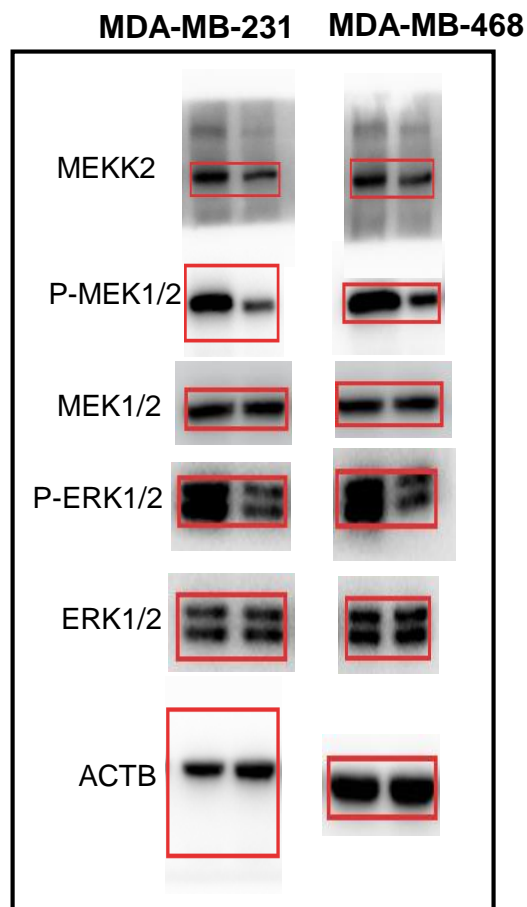

**Fig. 6H**

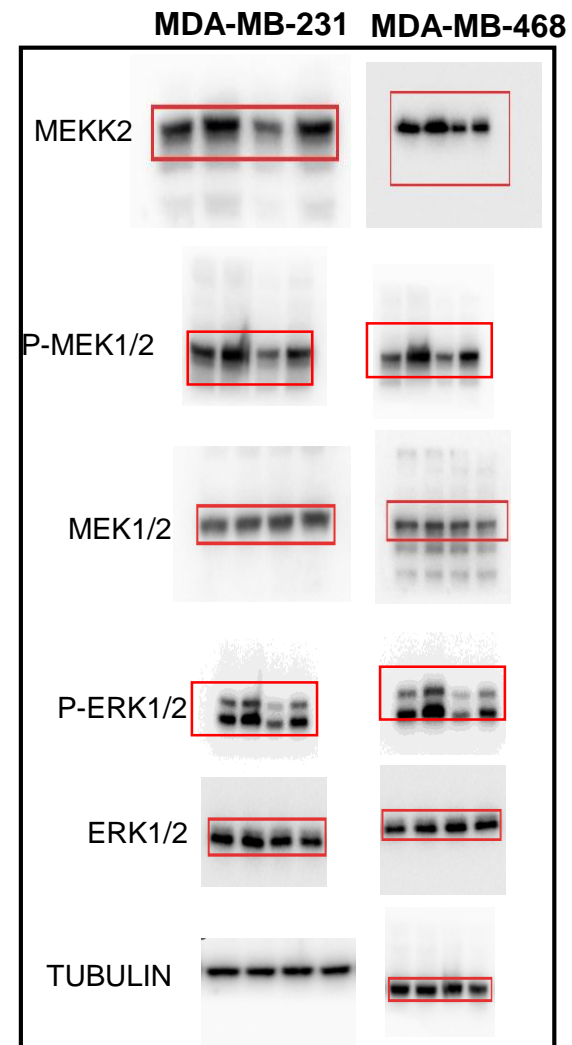



Fig. 7D

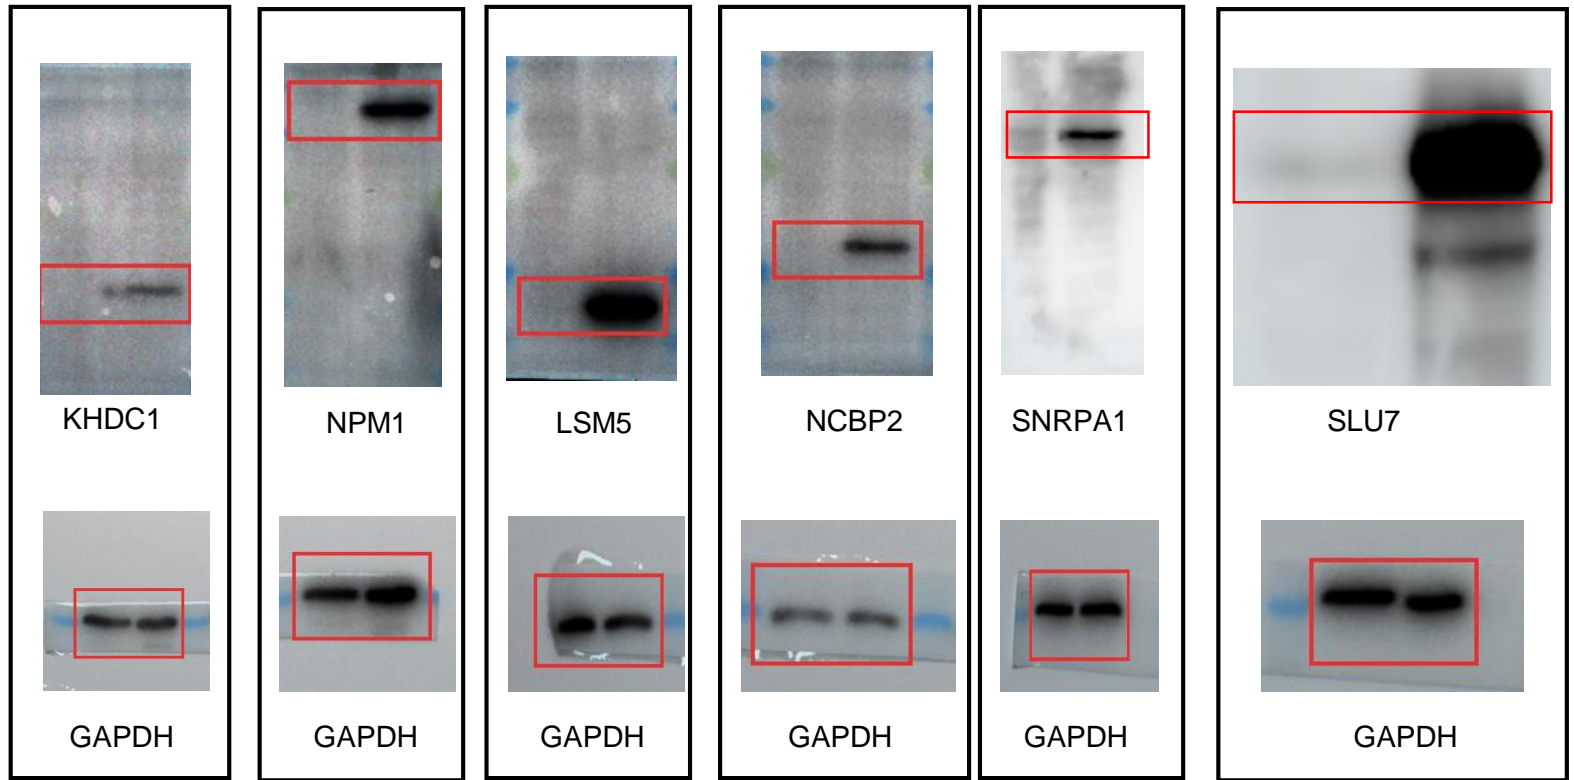

**Fig. 8A**

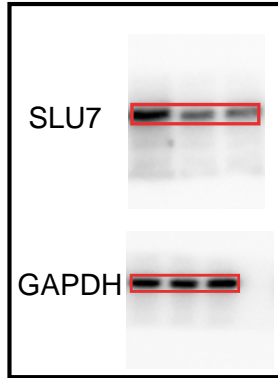

**Fig. 8B**

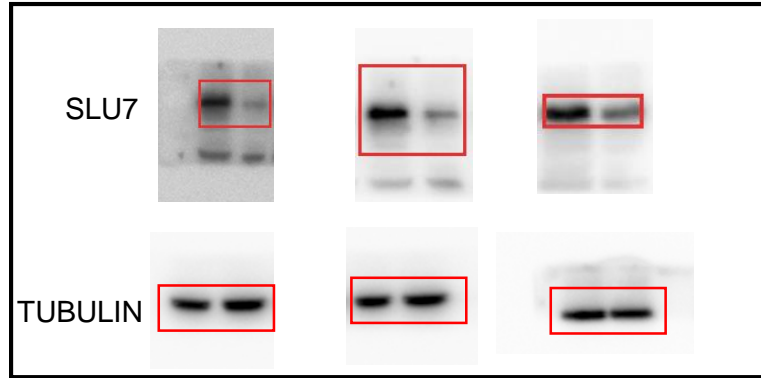

**Fig. 8G**

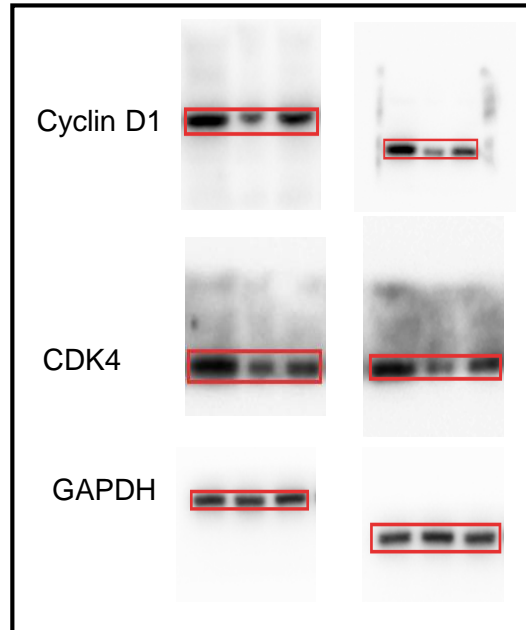



**Fig. S3C**

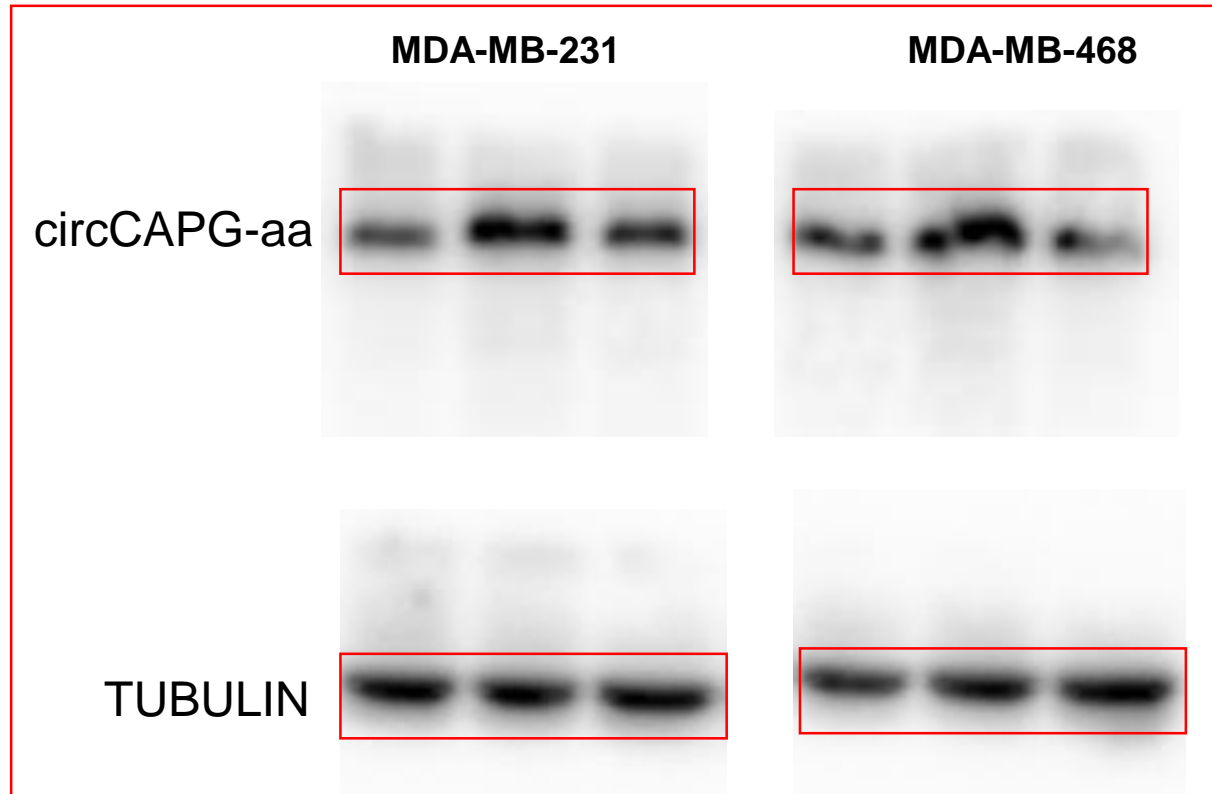

**Fig. S4A**

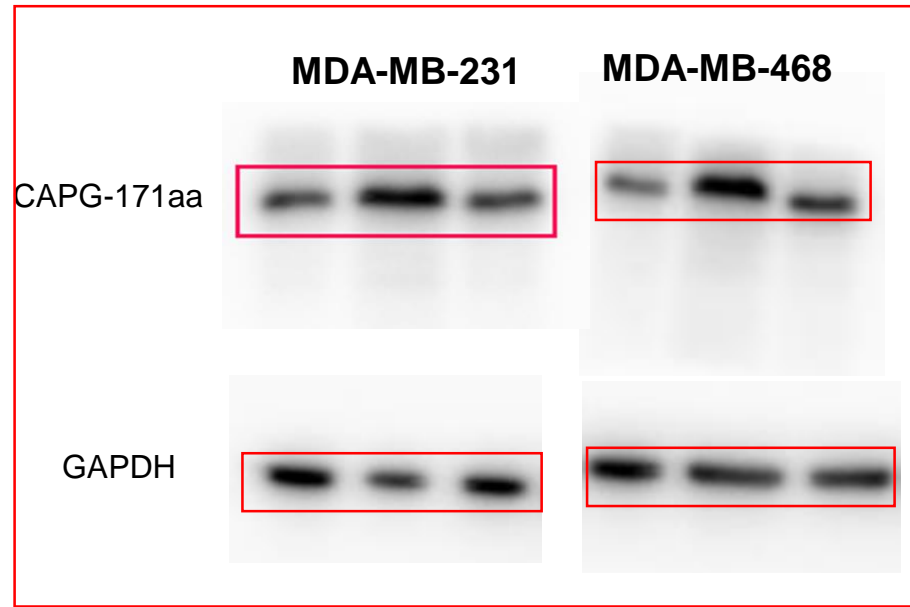

**Fig. S4B**

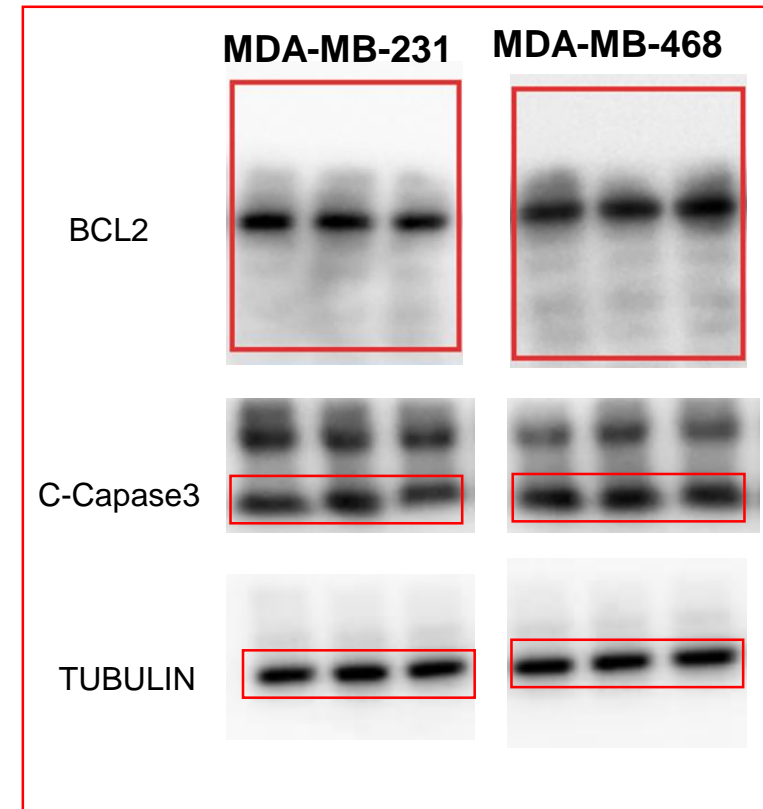

**Fig. S5B**

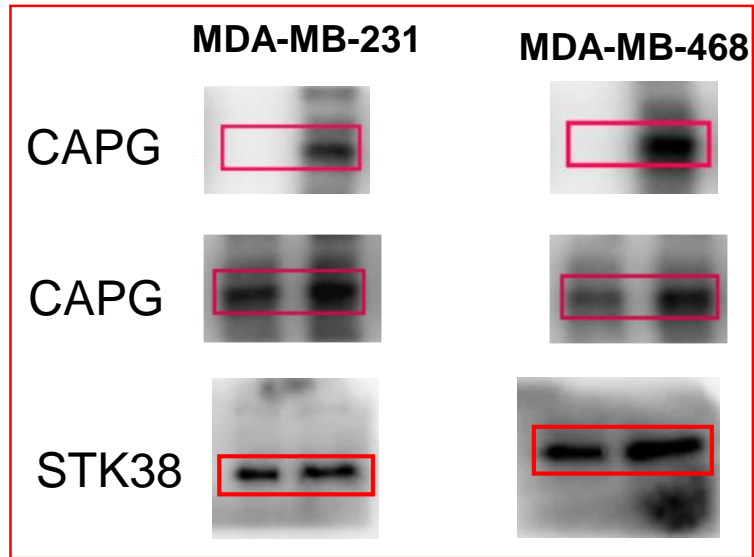

**Fig. S5C**

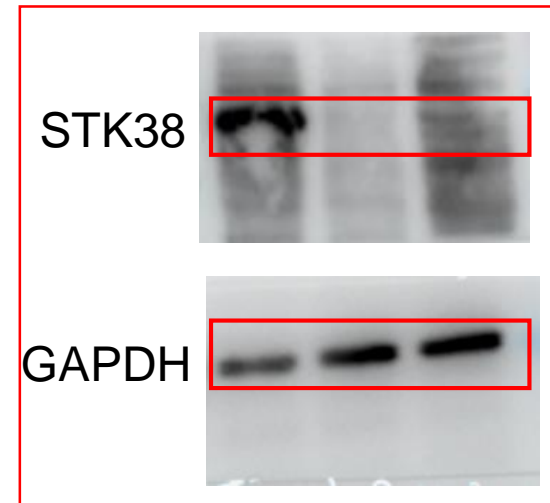

**Fig. S5D**

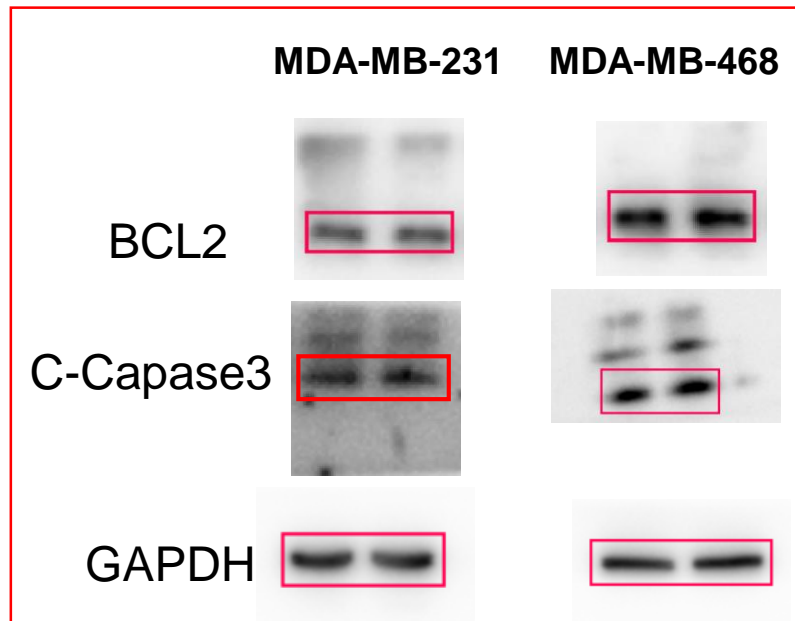

**Fig. S5E**

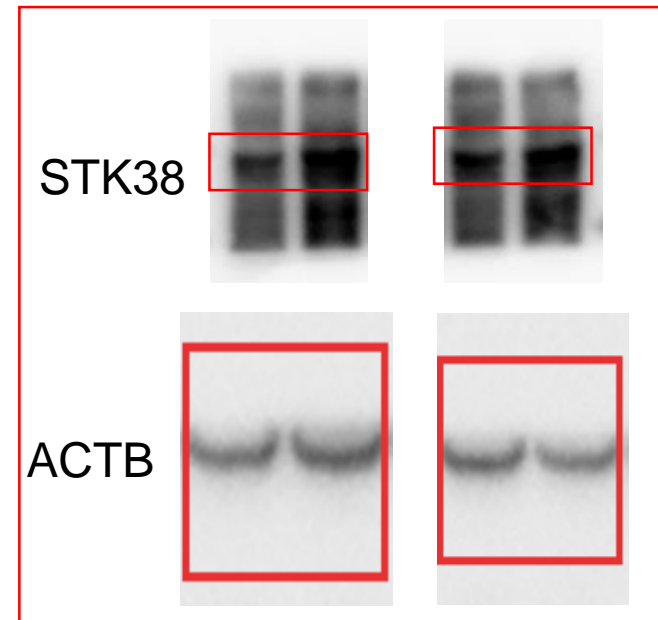

**Fig. S6A**

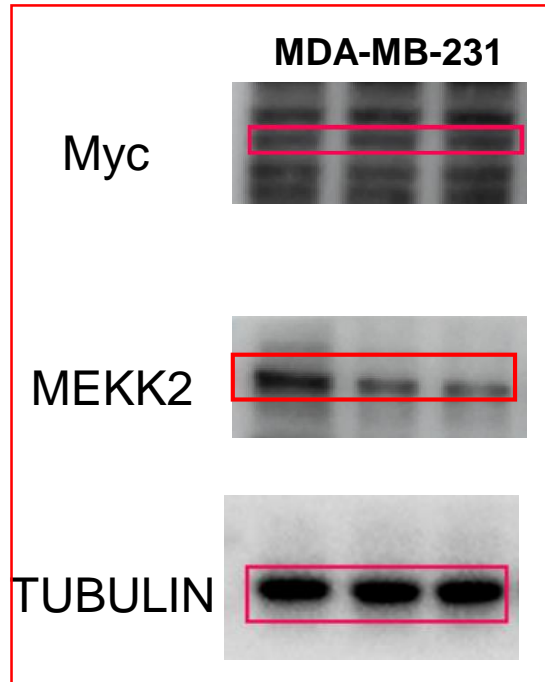

**Fig. S6D**

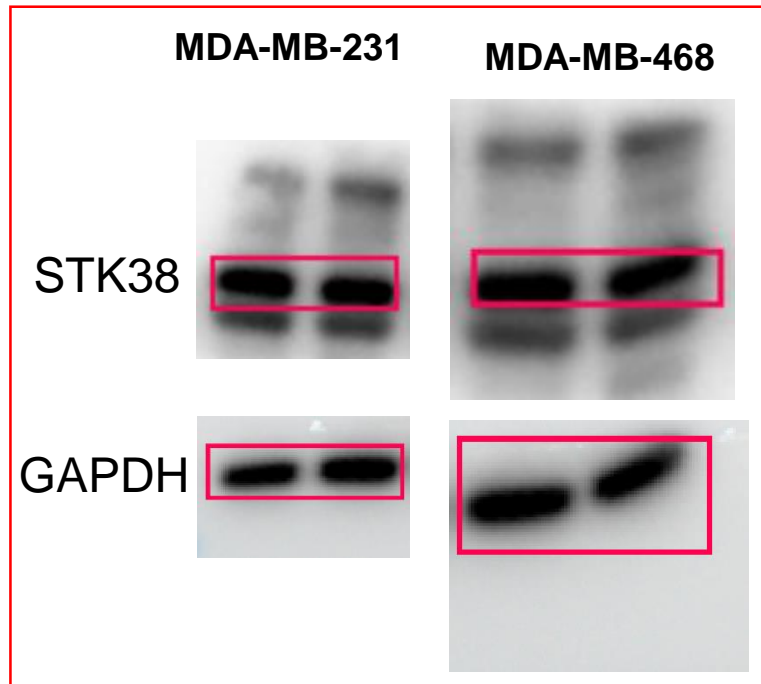

**Fig. S6F**

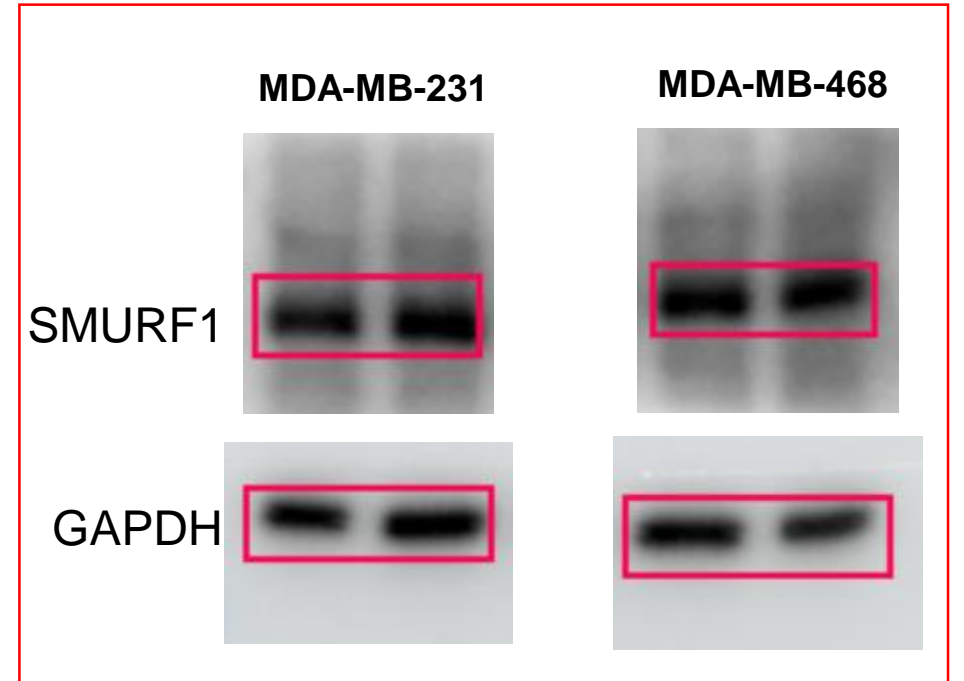

**Fig. S6G**

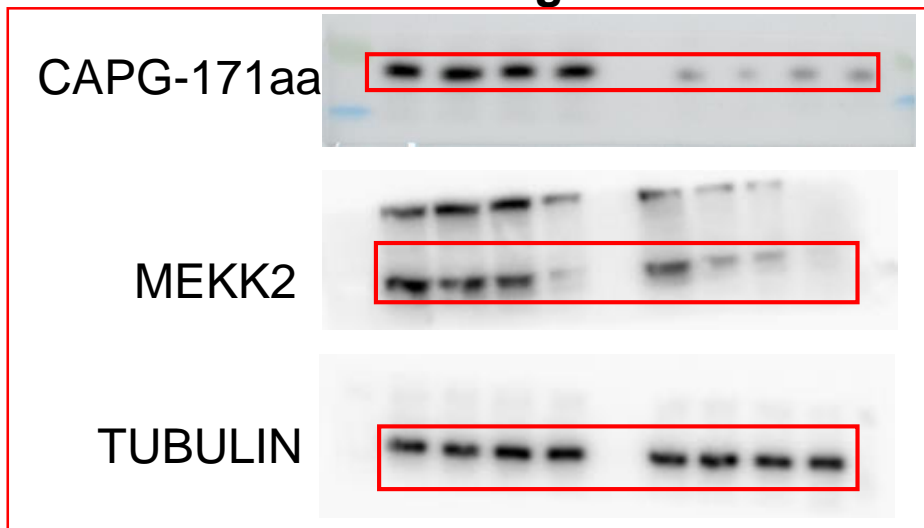

Fig. S7C

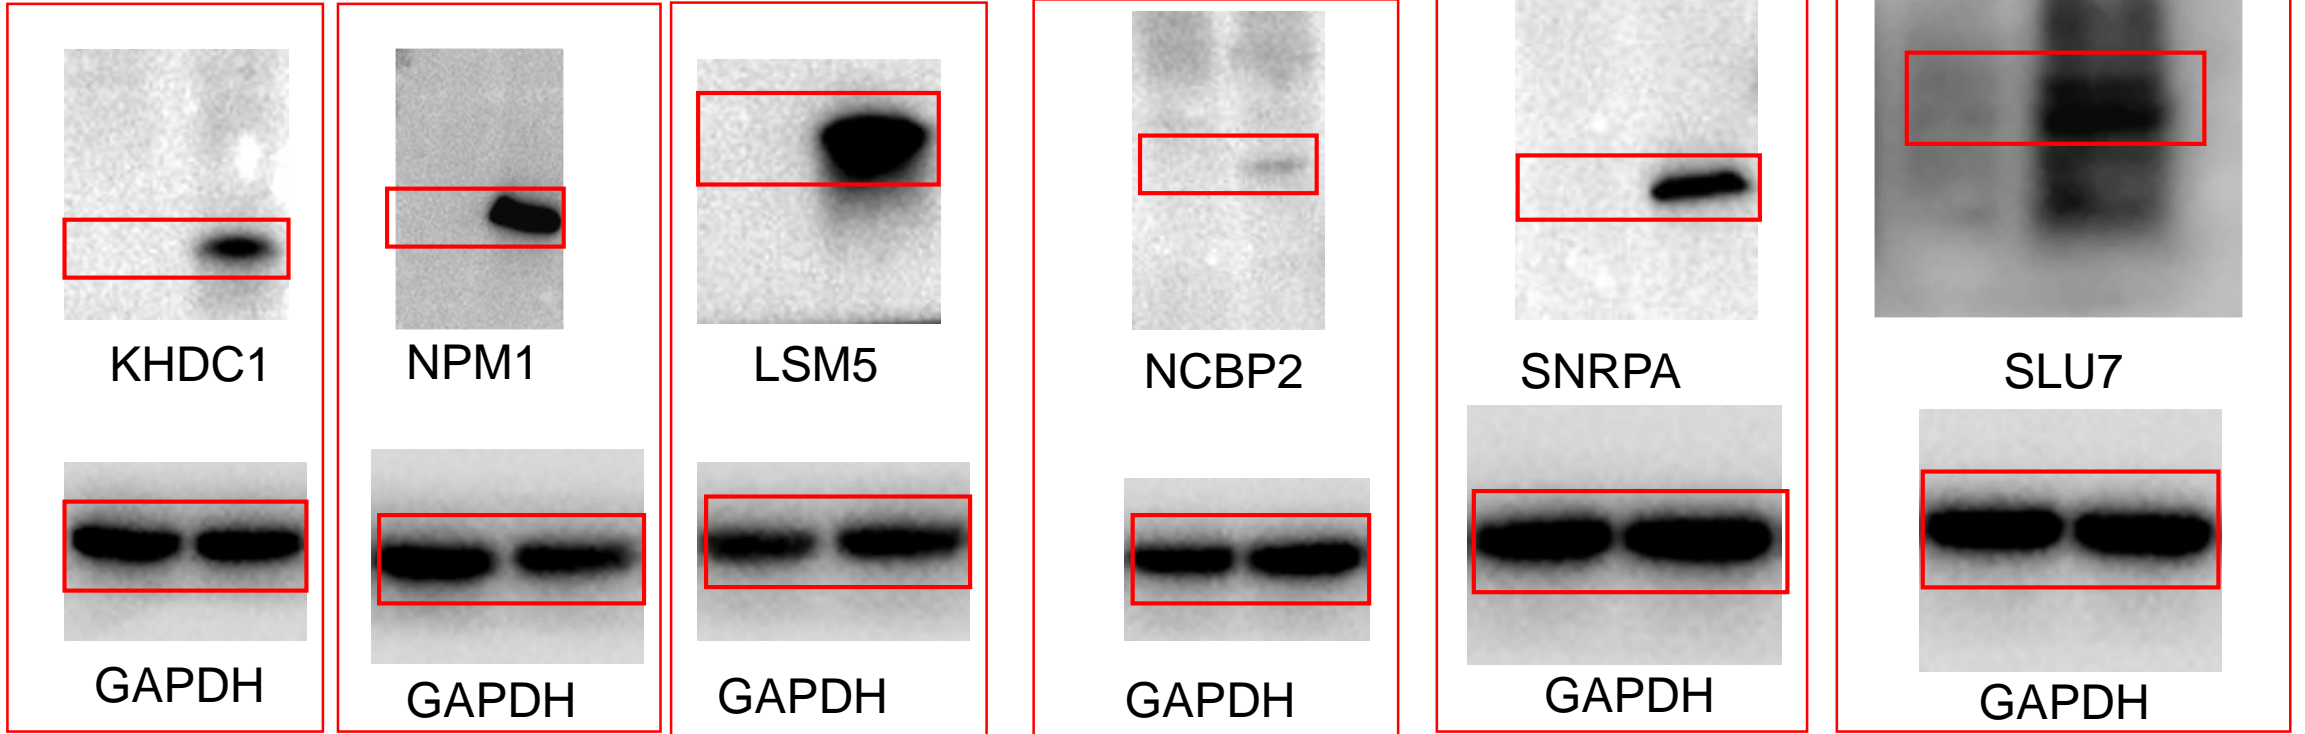



**Fig. S7I**

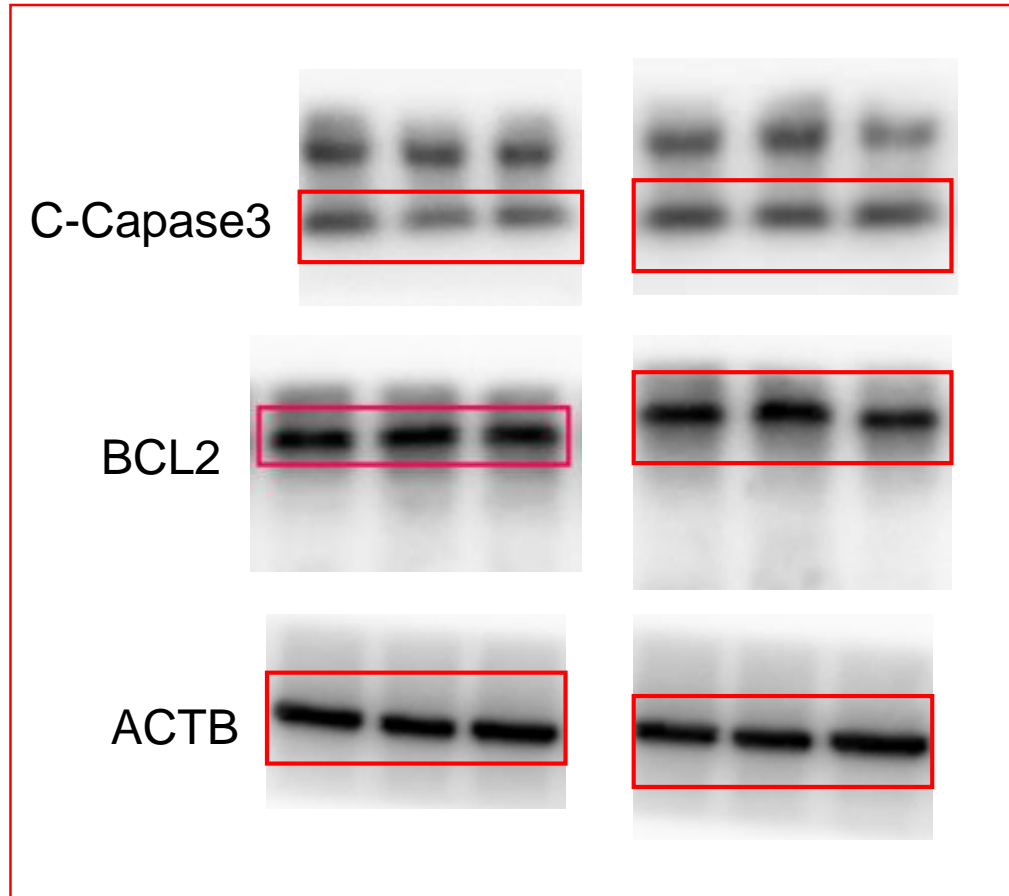

Supplement: 12943_2023_1806_MOESM2_ESM.pdf [file 12943_2023_1806_MOESM2_ESM.pdf]
