# Supplementary material for: A novel polypeptide CAPG-171aa encoded by circCAPG plays a critical role in triple-negative breast cancer
Source: Springer Nature journal article supplement (doi:10.1186/s12943-023-01806-x), 2023-07-05

**A**

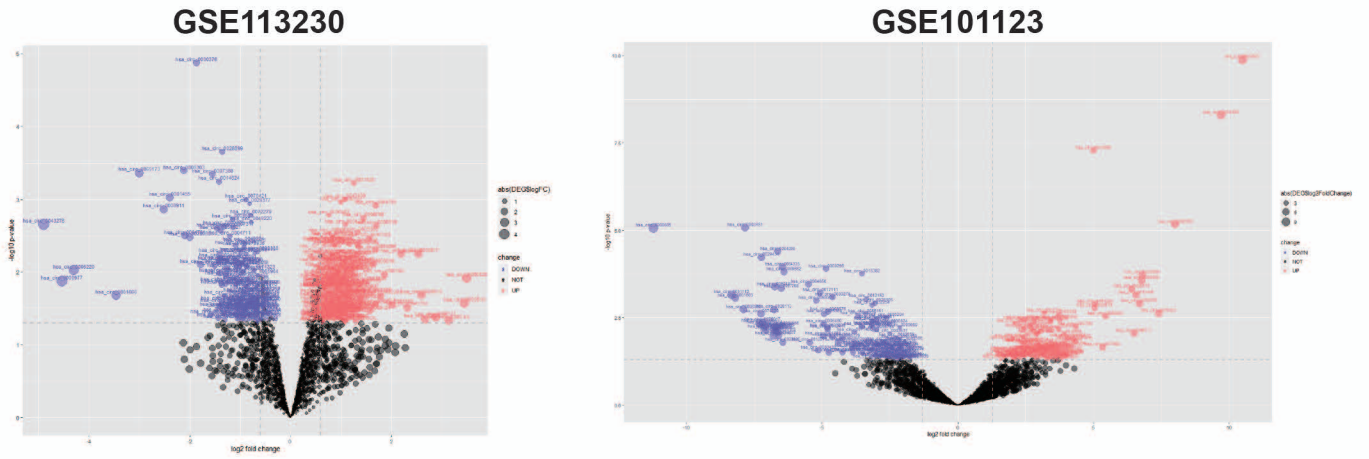

**B**

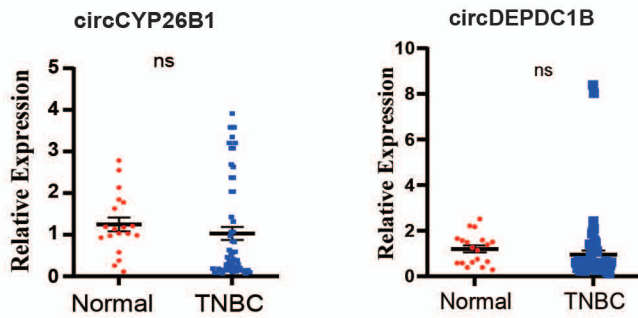

**D**

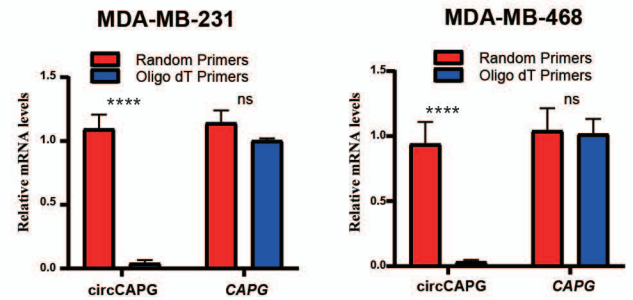

**C**

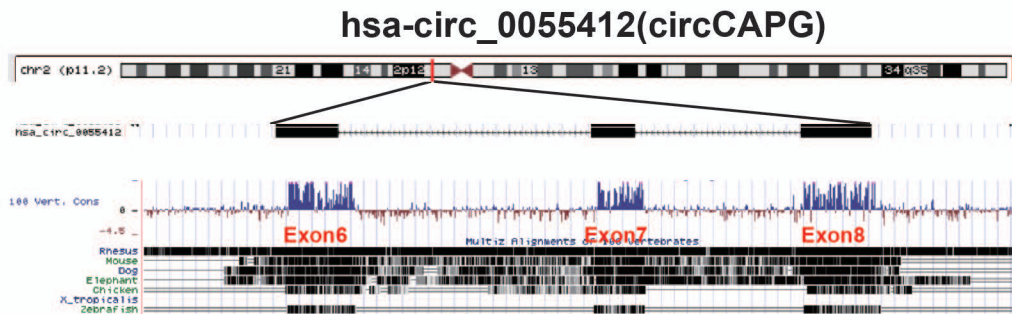

**A**

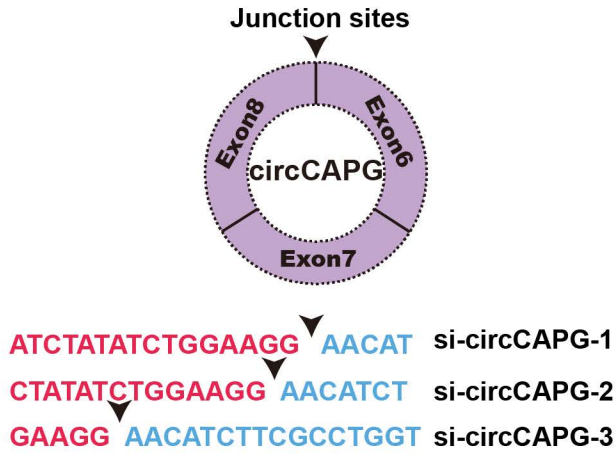

**MDA-MB-231**

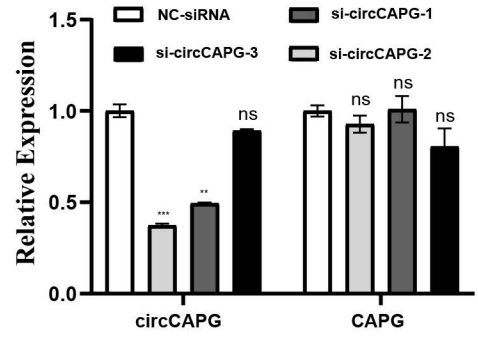

**MDA-MB-468**

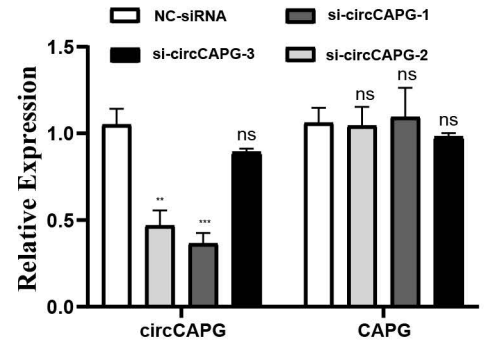

**B**

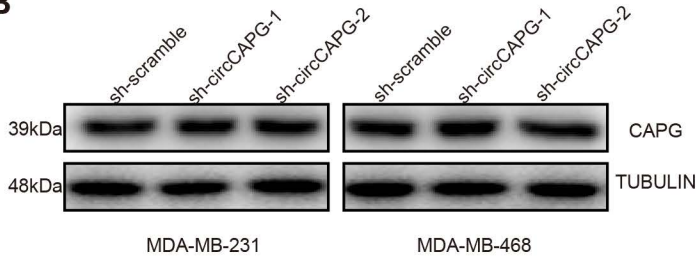

**C**

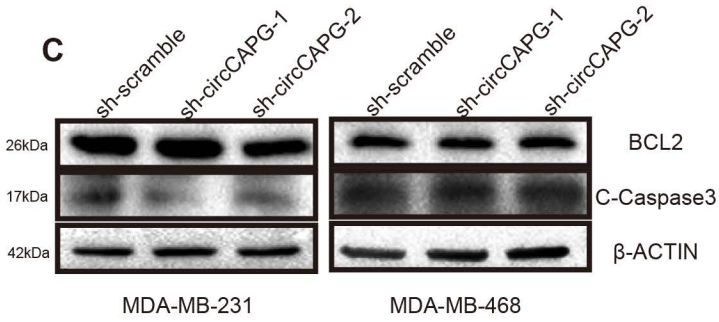

**D**

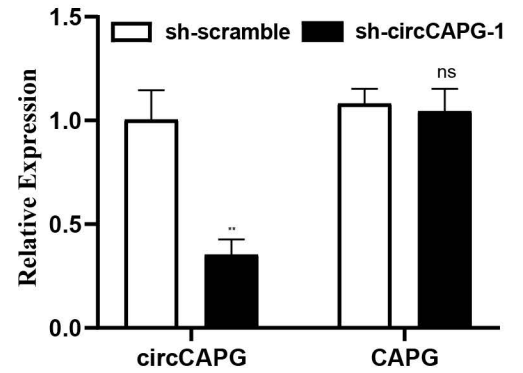

A

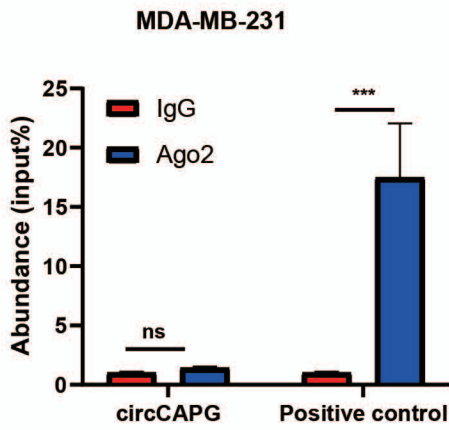

B

|                                                                                                                                                                                                                                                                                                                |                                                                                                                                                                                                                                                                                                                                                                                                                                                                                                                          |                 |                      |
|----------------------------------------------------------------------------------------------------------------------------------------------------------------------------------------------------------------------------------------------------------------------------------------------------------------|--------------------------------------------------------------------------------------------------------------------------------------------------------------------------------------------------------------------------------------------------------------------------------------------------------------------------------------------------------------------------------------------------------------------------------------------------------------------------------------------------------------------------|-----------------|----------------------|
| Transcript id                                                                                                                                                                                                                                                                                                  | NM_001256139                                                                                                                                                                                                                                                                                                                                                                                                                                                                                                             |                 |                      |
| Exon                                                                                                                                                                                                                                                                                                           | Exon Number                                                                                                                                                                                                                                                                                                                                                                                                                                                                                                              | Exon id (total) | Exon Sizes           |
|                                                                                                                                                                                                                                                                                                                | 3                                                                                                                                                                                                                                                                                                                                                                                                                                                                                                                        | 3,4,5 (18)      | 133, 93, 150         |
| Spliced seq length                                                                                                                                                                                                                                                                                             | 376 nt                                                                                                                                                                                                                                                                                                                                                                                                                                                                                                                   |                 |                      |
| Sequence                                                                                                                                                                                                                                                                                                       | AACATCTTCG CCTG6T6T6G T66AAGTCC AACATCTCG AACSCAACA G6GAG6GAC CT6CCCTG6 CCATCC6GGA<br>CA6T6G6C6A CA6G6C6A6G6 C6CA6G6T6G6A GAT6T6T6CACT GAT6G6G6A6G6 A6C6T6C6T6G6A GAT6AT6C6C6A6 G6T6C6T6G6C6C<br>CC6A6G6C6T6G6 T6C6T6A6A6G6A6G6 G6C6A6C6C6C6T6 A6G6A6A6G6A6C6T6 C6A6C6T6G6A6C A6A6G6C6A6A6T6 C6C6A6G6C6C6C A6C6T6T6T6A6<br>A6G6T6C6T6G6 A6T6C6A6C6T6G6 A6C6A6T6G6A6C C6T6A6C6A6G6 T6G6C6T6G6A6C C6A6C6A6T6T6 G6C6C6T6G6A6C T6C6T6G6A6T6C<br>T6A6T6G6A6C T6T6T6G6C6T6G6 A6C6A6C6G6G6C C6T6T6G6C6A6G A6T6A6T6A6T6C G6A6A6G |                 |                      |
| Protein coding potential                                                                                                                                                                                                                                                                                       |                                                                                                                                                                                                                                                                                                                                                                                                                                                                                                                          |                 |                      |
| IRES Elements                                                                                                                                                                                                                                                                                                  | Parameter Index                                                                                                                                                                                                                                                                                                                                                                                                                                                                                                          |                 |                      |
|                                                                                                                                                                                                                                                                                                                | Position (start-end)                                                                                                                                                                                                                                                                                                                                                                                                                                                                                                     | R Score         | With Pseudoknot (YN) |
|                                                                                                                                                                                                                                                                                                                | 26-39                                                                                                                                                                                                                                                                                                                                                                                                                                                                                                                    | 1.467281        | Y                    |
|                                                                                                                                                                                                                                                                                                                | 29-86                                                                                                                                                                                                                                                                                                                                                                                                                                                                                                                    | 1.466247        | Y                    |
| Open Reading Frame (ORF)                                                                                                                                                                                                                                                                                       | Start Position                                                                                                                                                                                                                                                                                                                                                                                                                                                                                                           | End Position    | Protein Length       |
|                                                                                                                                                                                                                                                                                                                | 323                                                                                                                                                                                                                                                                                                                                                                                                                                                                                                                      | 2+86            | 171 aa               |
| <p>MTALCWTGTS VARSISGRNI FAWCGGKSNI LERNKARDLA LAIRDSEKQ KAQVEIVTDG EEPAEIQVL GPKPALKEGNPEEDLTADKANAQAALYKVS<br/>DATGQMNLTKVADSSPFALLELLISDDCFVLDNGLCGKIYIWKGRKAN<br/>EKERQAALQVAEGFISRMQYAPNTQVEILPQGRESPIFKQFFKDWK</p> <p>Note:<br/>(1), nr represents n rounds(n&lt;3); (2), * represents a stop codon.</p> |                                                                                                                                                                                                                                                                                                                                                                                                                                                                                                                          |                 |                      |

C

CAPG full length  
 MYTAIPQSGSPFPGSVQDPGLHVWRVEKLPVPVAQENQGVFFSGDSYLVLHNGPEEVSH  
 LHLWIGQQSSRDEQGACAVLAVHLNLTLLGERPVQHREVQGNESDLFMSYFPRGLKYQEGG  
 VESAFHKTSTGAPAAIKKLYQVKGKKNIRATERALNWDSFNTGDCFILDLGQ **NIFAWCGGKSNILERNKARDLALAIRDSERQGKAQVEIVTDGEEPAEMIQVLGPKPALKEGNPEEDLTADKANAQAALYKVS  
 DATGQMNLTKVADSSPFALLELLISDDCFVLDNGLCGKIYIWKGRKAN**  
 ANEKERQAALQVAEGFISRMQYAPNTQVEILPQGHESPIFKQFFKDWK

CAPG-171aa  
 MTALCWTGTS VARSISGRNI **FAWCGGKSNI LERNKARDLA LAIRDSEKQ KAQVEIVTDG  
 EEPAEIQVL GPKPALKEGN PEEDLTADKANAQAALYKVS  
 DATGQMNLTKVADSSPFALLELLISDDCFVLDNGLCGKIYIWK**EHLRLVW WKVQHPGTQQ GEGPGPGHPG Q

CAPG Polyclonal antibody(Proteintech #10194-1-AP)  
 HLWIGQQSSRDEQGACAVLAVHLNLTLLGERPVQHREVQGNESDLFMSYFPRGLKYQEGGV  
 ESAFHKTSTGAPAAIKKLYQVKGKKNIRATERALNWDSFNTGDCFILDLGQ **NIFAWCGGKSNILERNKARDLALAIRDSERQGKAQVEIVTDGEEPAEMIQVLGPKPALKEGNPEEDLTADKANA  
 QAALYKVS  
 DATGQMNLTKVADSSPFALLELLISDDCFVLDNGLCGKIYIWK**GRKAN  
 EKERQAALQVAEGFISRMQYAPNTQVEILPQGRESPIFKQFFKDWK  
 (62-348 aa encoded by BC000728)

**Blue marked CAPG antibody targeting sequence**

D

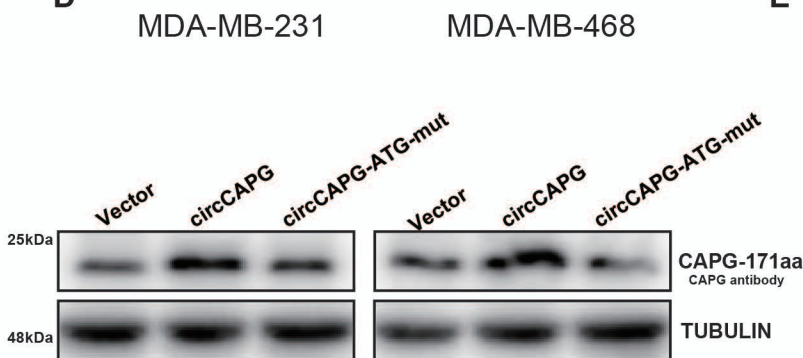

E

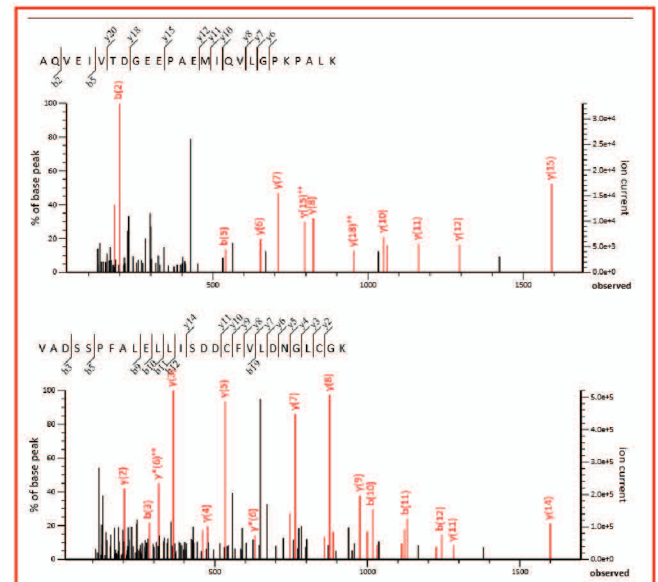



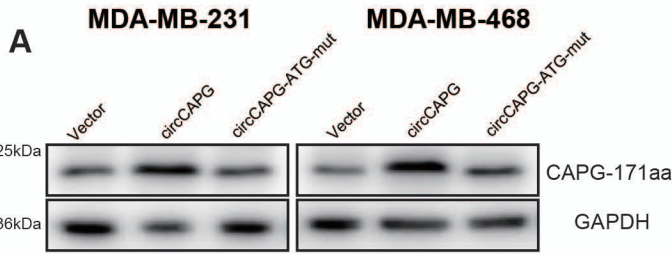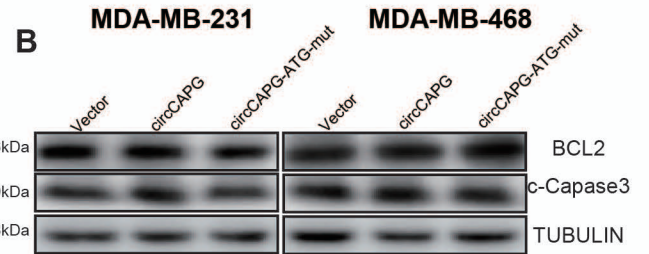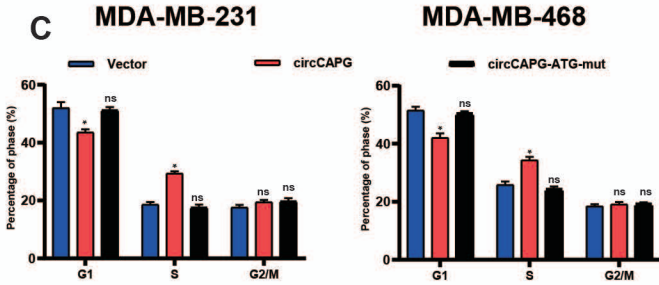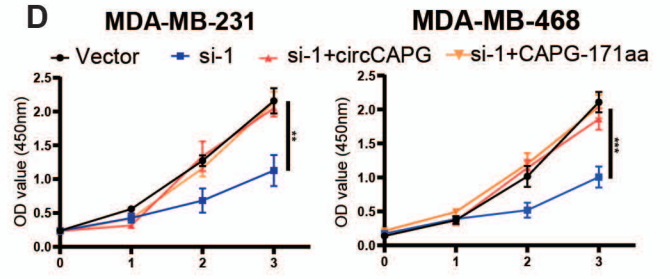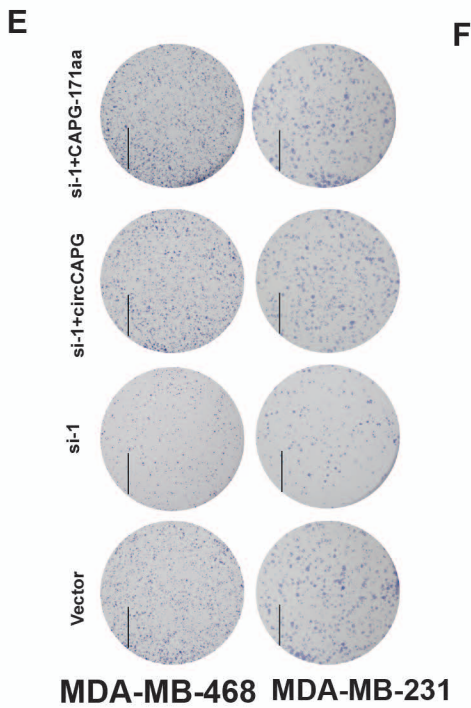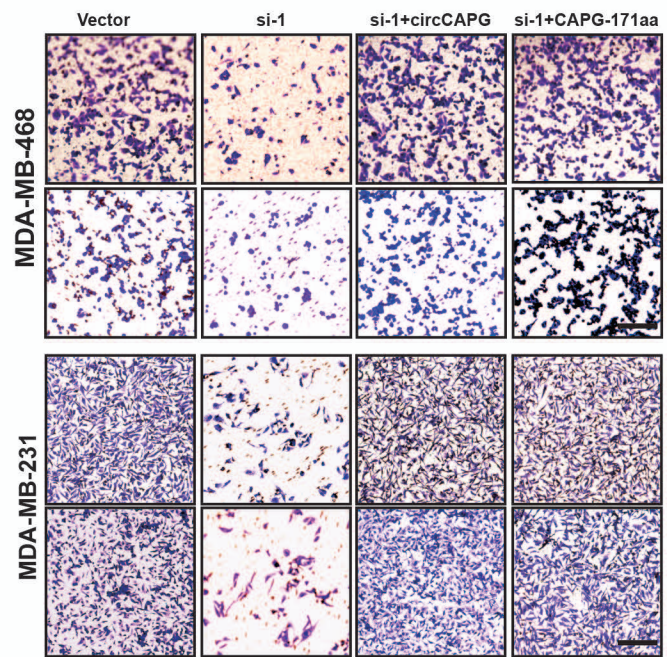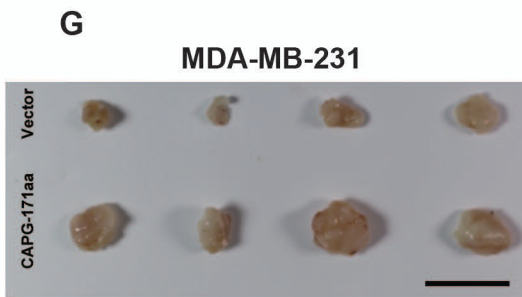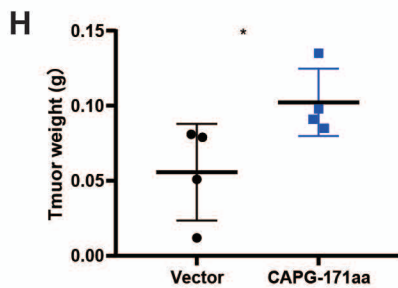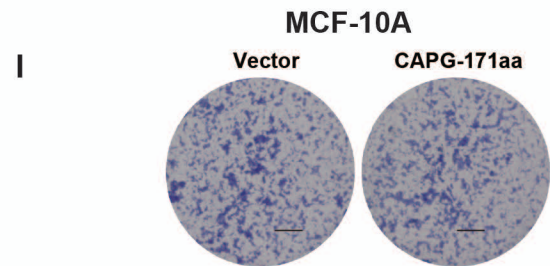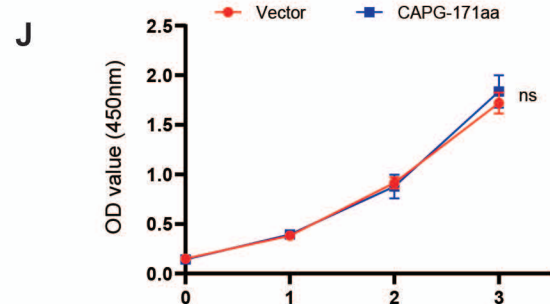





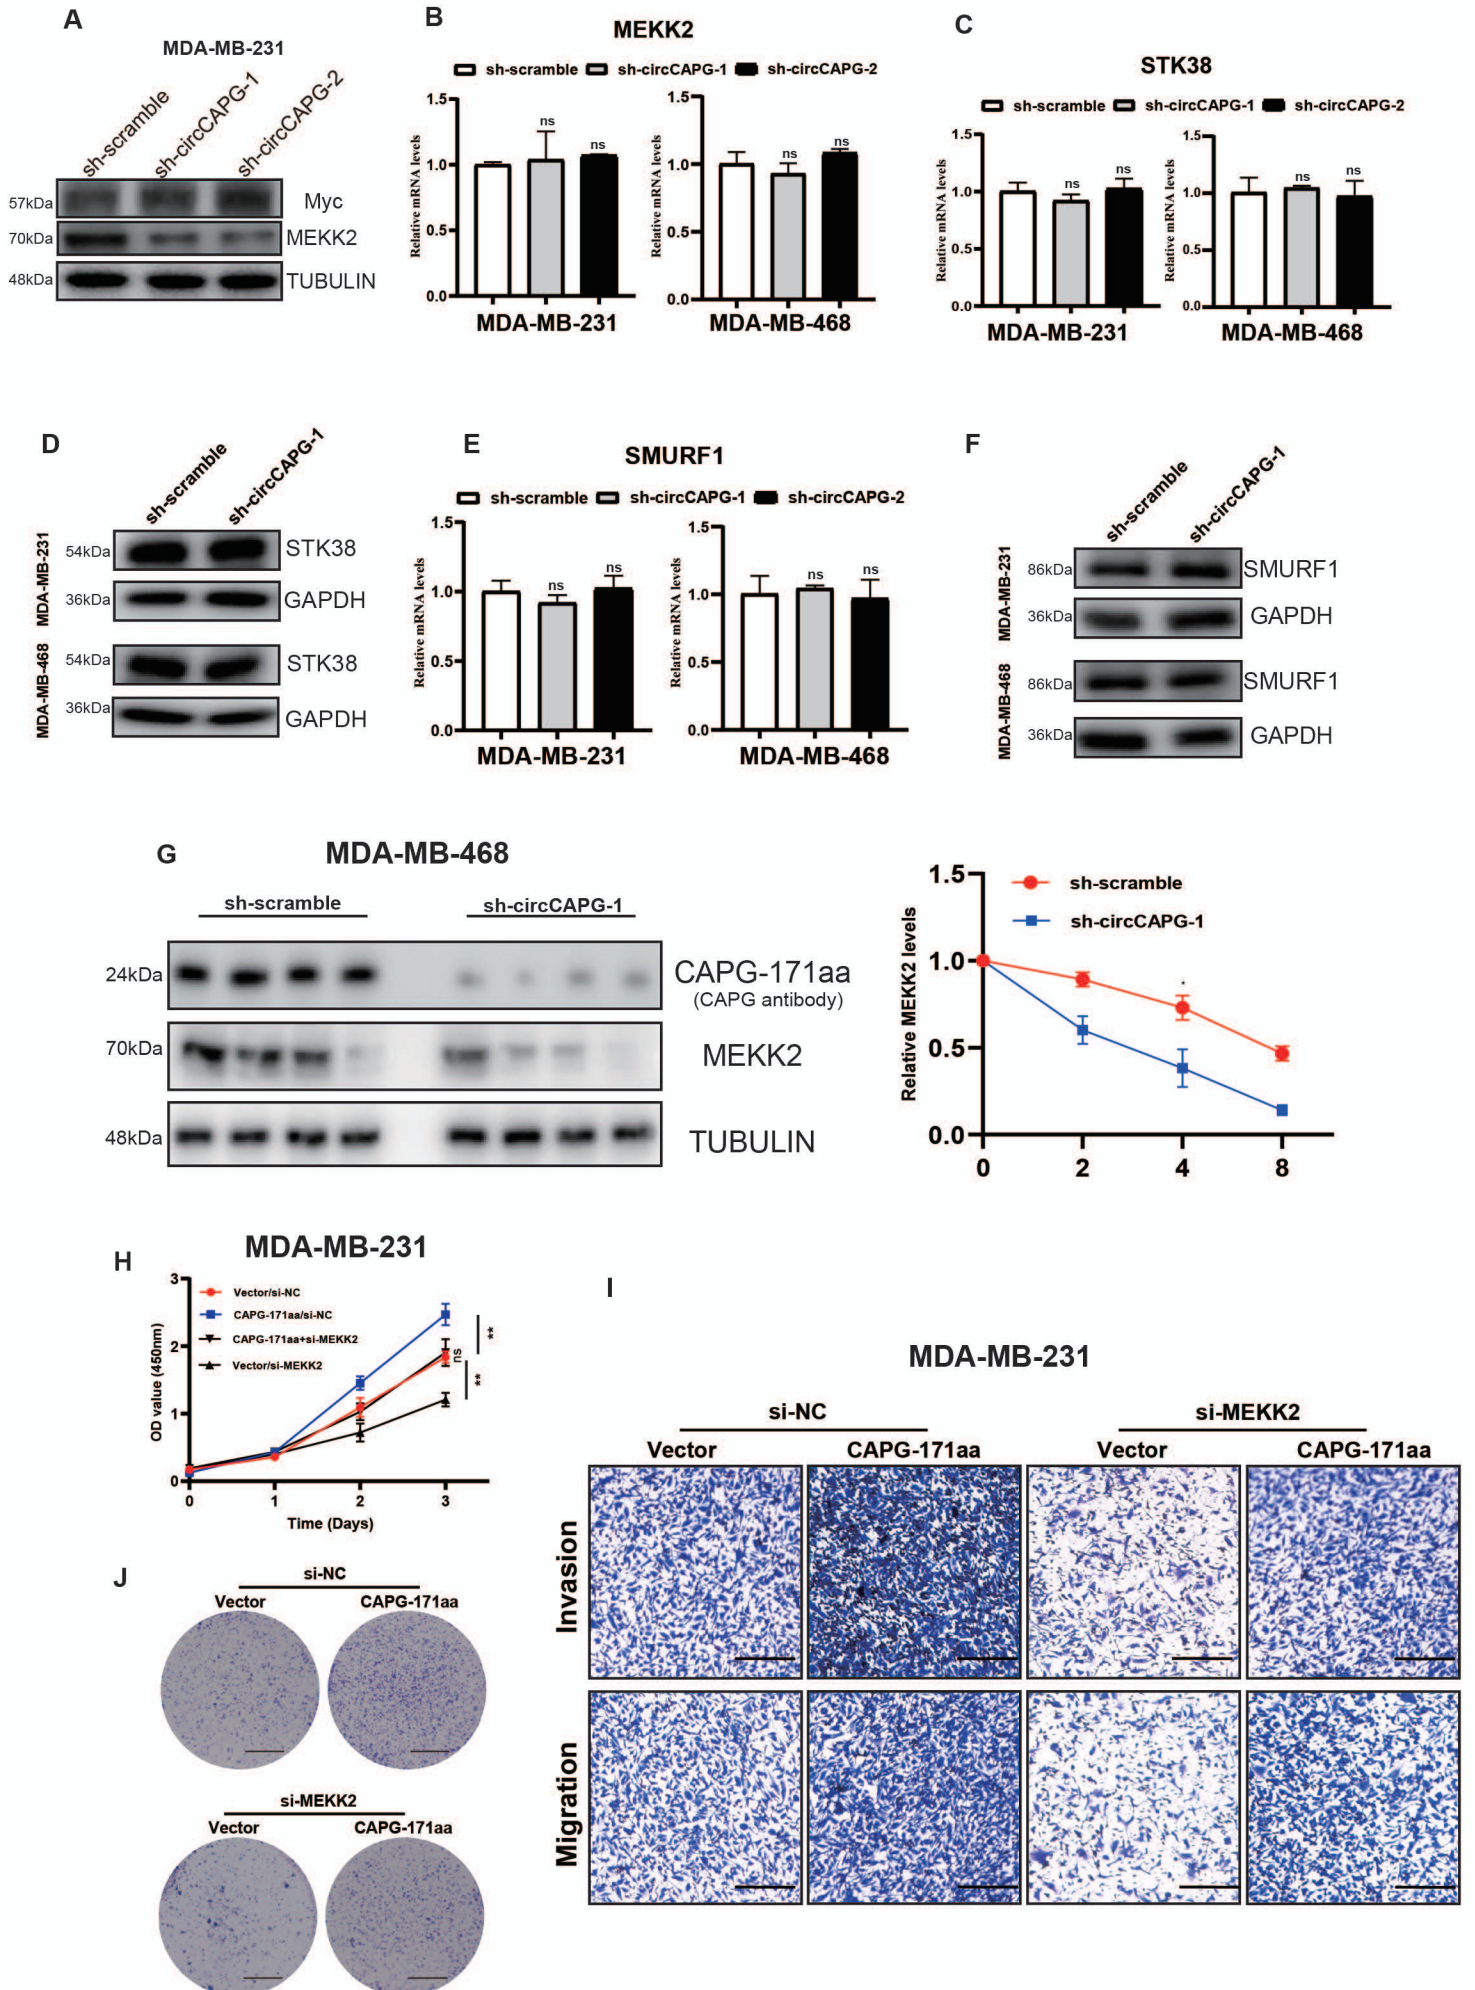

A

### CircInteractome

| circRNA          | Tag Name                                 | % Identity | Alignment Length | Mismatches | Gap Openings | Tag Start | Tag End | circRNA Start | circRNA End | Upstream/Downstream |
|------------------|------------------------------------------|------------|------------------|------------|--------------|-----------|---------|---------------|-------------|---------------------|
| hsa_circ_0055412 | HHLE1_206509_elf4AIII_rep1_206509_32_152 | 100.00     | 152              | 0          | 0            | 1         | 152     | 0             | +392        | Downstream          |
| hsa_circ_0055412 | HHLE1_206515_elf4AIII_rep1_206515_3_43   | 100.00     | 43               | 0          | 0            | 1         | 43      | -205          | -163        | Upstream            |
| hsa_circ_0055412 | HHLE2_673405_elf4AIII_rep2_673405_41_137 | 100.00     | 137              | 0          | 0            | 1         | 137     | 0             | -377        | Downstream          |

B

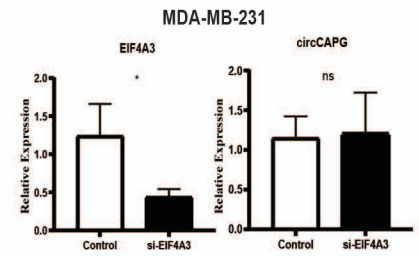

C

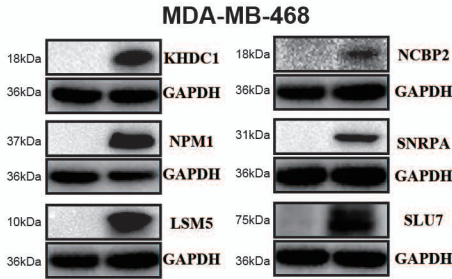

D

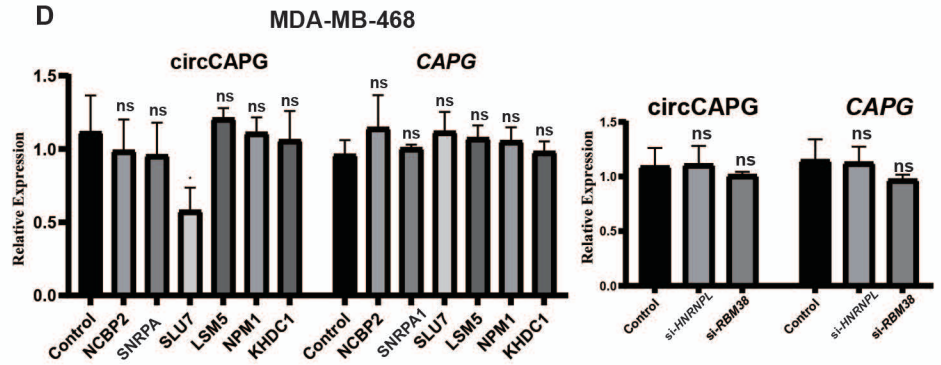

E

### The potential SLU7 binding sites

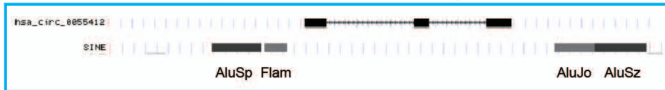

G

### The high homology between AluSp and AluSz

Sequence ID: Query\_5125 Length: 297 Number of Matches: 1

Range 1: 7 to 293 Graphics

Next Match Previous Match

| Score         | Expect                                                       | Identities   | Gaps       | Strand    |
|---------------|--------------------------------------------------------------|--------------|------------|-----------|
| 244 bits(132) | 2e-69                                                        | 244/296(82%) | 15/296(5%) | Plus/Plus |
| Query 14      | GCTCAGGCTGTAATTOCCAGCACTTTGGGAGGCGGAGGTGGCGAGATCACCTGAGGTC   | 71           |            |           |
| Sbjct 7       | GCTCACATCTGTAATTOCCAGCACTTTGGGAGGCGGAGGCGGTCATCACTTGAAGTC    | 64           |            |           |
| Query 72      | GGAGTTCGAGACCAAGGCTGACCAACATCGAGAAACCCCATCTCTACTAAAAATATAAA  | 130          |            |           |
| Sbjct 65      | ACAAGTTCGAGACCAAGGCTGCTAGTCAAAACCCCATCTCTACTAAAAATACAAAA     | 118          |            |           |
| Query 131     | ATTAGCCGGGCTGTTGGGCACATGCTGTAATTOCCAGCTACTCGGAGGCTGATGCAAGGA | 190          |            |           |
| Sbjct 119     | ATTAGCCAGGCTGTTGGGCACGCACTGCTACTOCCAGCTACTCGGAGGCTAAGCCAGGA  | 178          |            |           |
| Query 191     | GGATCTCTTGAAGCCAGGAGGTTGGGCTGAGCTGAGATTGTACCATTGCACTTCC      | 250          |            |           |
| Sbjct 179     | GAATTGCTTGAAGCCAGGAGGTTGGGCTGAGCTGAGCTGAGATTGTACCATTGCACTTCC | 238          |            |           |
| Query 251     | AGCTGGGCAACAAGAGGAACTGCTCAAAAAAAAAAAAAAAAAAAAAAAAAAAAAAAAA   | 303          |            |           |
| Sbjct 239     | AGCTGGGTAACA-GAGCAAGATTCTCTCAAAAAAAAAAAAAAAAAAAAAAAAAAAAAA   | 293          |            |           |

F

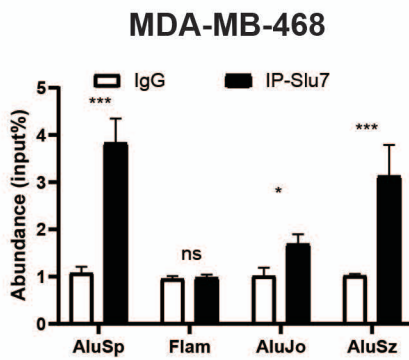

### SLU7

H

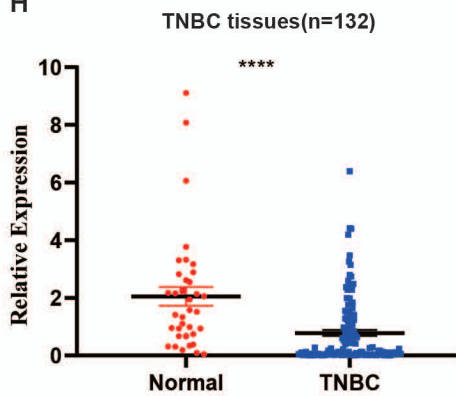

I

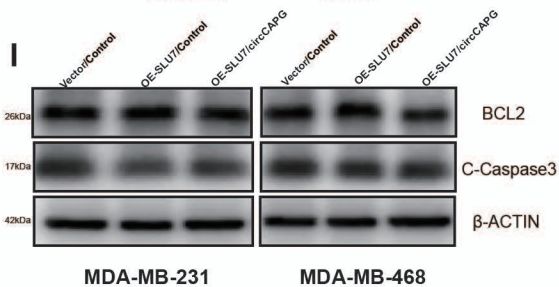

J

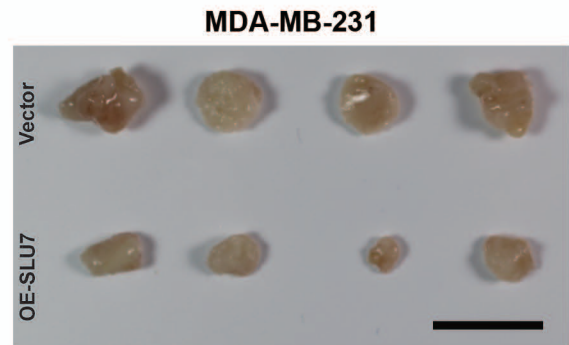

K

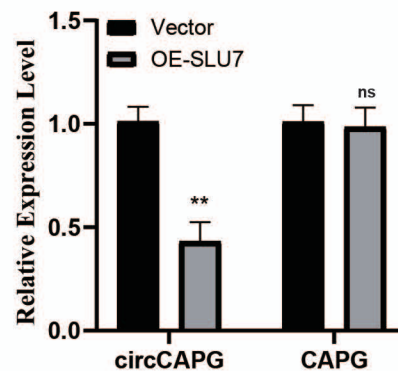

Supplement: MOESM3 [file 25577360]
