# Supplementary material for: A novel polypeptide CAPG-171aa encoded by circCAPG plays a critical role in triple-negative breast cancer
Source: Mol Cancer. 2023 Jul 5;22:104. doi: 10.1186/s12943-023-01806-x (PMC10320902; doi:10.1186/s12943-023-01806-x)
Supplement: Supplementary file 1 — Supplementary Material 1 [file 12943_2023_1806_MOESM1_ESM.xlsx]

## Sheet: Table-S1
Sequences of Oligonucleotide Primers for the RT-PCR Assay.
Gene	Sequences (5’- 3’)	TM
UBA52-cF	ATGCAGATCTTTGTGAAGAC	60°C
UBA52-cR	TTATTTGACCTTCTTCTTGG	56°C
PRPF31-cF	ATGTCTCTGGCAGATGAGCT	66°C
PRPF31-cR	TCAGGTGGACATAAGGCCAC	67°C
TUFM-cF	ATGACCACAATGGCGGC	66°C
TUFM-cR	TCAACCCCATTTGATATTCT	58°C
PPM1B-cF	ATGGGTGCATTTTTGGATAA	59°C
PPM1B-cR	TCATATTTTTTCACCACTCA	56°C
ATP5F1A-cF	ATGCTGTCCGTGCGCGTT	71°C
ATP5F1A-cR	TTAAGCTTCAAATCCAGCCA	62°C
STK38-cF	ATGGCAATGACAGGCTCAACA	67°C
STK38-cR	TCATTTTGCTGCTTTCATGTA	60°C
GTF2I-cF	ATGGCCCAAGTTGCAATGTC	66°C
GTF2I-cR	CTACCACGTGGGGTCTGGTT	69°C
PFKFB3-cF	ATGCCGTTGGAACTGACGCA	70°C
PFKFB3-cR	TCAGTGTTTCCTGGAGGAGT	65°C
UQCRC2-cF	ATGAAGCTACTAACCAGAGC	61°C
UQCRC2-cR	TTACAACTCATCAACAAAAG	55°C
SNRPA-cF	tttccggtgaattccATGGCAGTTCCCGAGACCCGCC	83°C
SNRPA-cR	gagggagaggggcggCTTATCGTCGTCATCCTTGTAATCCTTCTTGGCAAAGGAGATC	83°C
NCBP2-TY-F	tttccggtgaattccATGTCGGGTGGCCTCCTGAAGG	81°C
NCBP2-cR	gagggagaggggcggCTTATCGTCGTCATCCTTGTAATCCTGGTTCTGTGCCAGTTTTC	84°C
SLU7-cF	tttccggtgaattccATGGACTTGGGGCTAGCTGCGG	81°C
SLU7-cR	gagggagaggggcggCTTATCGTCGTCATCCTTGTAATCCTGTCCAAGGAAAGAGGCCA	85°C
NPM1-cF	ccCTCGAGATGGAAGATTCGATGGACAT	71°C
NPM1-cR	cgGGATCCCTTATCGTCGTCATCCTTGTAATCAAGAGACTTCCTCCACT	79°C
LSM5-cF	ccCTCGAGATGGCGGCTAACGCTACTAC	76°C
LSM5-cR	cgGGATCCCTTATCGTCGTCATCCTTGTAATCCACTTCAGGTCCTTCTC	80°C
KHDC1-cF	ATGGACATGGGAACGAGT	63°C
KHDC1-cR	TTACGGATACAGTGAACTCAA	60°C
circCAPG-divergent-F	TCTCTGATGCCACTGGACAG	67°C
circCAPG-divergent-R	CCTTGTTGCGTTCCAGGATG	67°C
circCAPG-convergent-F	AAGCTGAAGCCGGTGCCTGT	73°C
circCAPG-convergent-R	CTATCCACAGGTGCAGATGGGA	69°C
Sequences of Oligonucleotide Primers for the Real-time PCR (qRT-PCR) Assay.
Gene	Sequences (5’- 3’)	TM
HNRNPL-qPCR-F	GGTCACCCAGCTTTTGTCAACTA	67°C
HNRNPL-qPCR-R	AGTGTAAAGAACATCCGTGGT	63°C
KHDC1-qPCR-F	TGGAAAACGATCAAGGCCCA	67°C
KHDC1-qPCR-R	CTAGGTGGATTAACGCGCCA	67°C
LSM5-qPCR-F	CAGAGCCTGTGGTGTCCG	69°C
LSM5-qPCR-R	TCAGTGACATCTTCCAGTACC	63°C
NCBP2-qPCR-F	AAAGCTATGCGGAAAACGCCA	68°C
NCBP2-qPCR-R	CTCTCCCAGCATCGTAGTCC	67°C
NPM1-qPCR-F	TCAACACCAAGATCAAAAGGACA	64°C
NPM1-qPCR-R	CCTTTCTCCCCATCTTTGGGC	69°C
RBM38-qPCR-F	AACTTTGACGGGAGGAGCTG	67°C
RBM38-qPCR-R	GGTCTTTGCAAGCCCTCTCA	68°C
SLU7-qPCR-F	CGGAGTCTTGCTCTGTCGC	69°C
SLU7-qPCR-R	CCTGGCTAACACGATGAAACC	66°C
SNRPA-qPCR-F	AAGATCCTTGAGCAGCCGAC	67°C
SNRPA-qPCR-R	AATAGTGTGGTTAGGGCGGG	67°C
U2AF2-qPCR-F	AAAGATCCGCAGGCCTCAC	68°C
U2AF2-qPCR-R	TCGTTCAGGTAGTTGGGTAAG	64°C
circCAPG-qPCR-F	GATCTATATCTGGAAGGAACATCT	52°C
circCAPG-qPCR-R	ATCATCTCAGCAGGCTCCTC	54°C
CAPG-qPCR-F	AAGCTGAAGCC GGTGCCTGT	56°C
CAPG-qPCR-R	TGCTGGCCTATCCACAGGTGCA	59°C
circCYP26B1-qPCR-F	ACGGGAAGGAGATGACCATG	54°C
circCYP26B1-qPCR-R	CTCAAAGAGGTGCCCAAGGT	54°C
circDEPDC1B-qPCR-F	AGCAGCCTATGTACTTGGGA	52°C
circDEPDC1B-qPCR-R	TCTCTTGTGAAGTGCCTGGT	52°C
circMYO9B-qPCR-F	ATCCTTCCCTACAGCCTCAG	54°C
circMYO9B-qPCR-R	CCTTCCTCTCGGCCTGTAG	54°C
circUBA2-qPCR-F	ATGGCAGTGATGATGGAGCT	52°C
circUBA2-qPCR-R	TGGAGGAAGTCATCTGCTTGA	52°C
Sequences of Oligo for siRNA
	sense（5'-3'）
EIF4A3-homo-1	GGUUUCAAAGAGCAGAUUUTT
EIF4A3-homo-2	CCUCCAGUGUUUGGAUAUUTT
HNRNPL-Homo-1	CACUGGUGGAGUUUGAAGATT
HNRNPL-Homo-2	GUUGCACUCUGAAGAUCGATT
RBM38-homo-1	CCACGUUCACCAAGAUCUUTT
RBM38-homo-2	GCCCUACAUUGAGUACACGTT
circCAPG-1	AUCUAUAUCUGGAAGGAACAUTT
circCAPG-2	CUAUAUCUGGAAGGAACAUCUTT
circCAPG-3	GAAGGAACAUCUUCGCCUGGUTT

## Sheet: Table-S2
Supplementary Table 2. Antibody list
Antibody	Company
SLU7	Proteintech, USA(12050-1-AP )(1:10000)
MEKK2	Proteintech, China(55106-1-AP)(1:10000)
MEK1/2	A4868, China(A4868)(1:2000)
SMURF1	Bioss, China(bs-9391R)(1:1000)
STK38	Huabio, China(ER60144)(1:500)
ERK1/2	Proteintech, China(11257-1-AP)(1:10000)
GAPDH	Proteintech, China(60004-1-Ig)(1:10000)
UB	Cell Signaling Technology, USA (#3936)(1:1000)
Phospho-MEK1/2 (Ser221)	Cell Signaling Technology, USA (#2338)(1:1000)
Phospho-p44/42 MAPK (Erk1/2) (Thr202/Tyr204)	Cell Signaling Technology, USA (#8544)(1:100)
FLAG	SMART, China(SLAB0101)(1:10000)
ACTB	Proteintech, China(81115-1-RR)(1:10000)
CDK4	AtaGenix , China(PA9437H)(1:1000)
Cyclin D1	Yeasen, China(30026ES50)(1:1000)
CAPG	(Bioss, bsm-60451M)(1:1000)
CAPG	(Proteintech, 10194-1-AP)(1:1000)
BCL2	(hengyuan, A-01203)(1:1000)
HA	Yeasen, China(30702ES20)(1:10000)
HIS	Yeasen, China(30401ES10)(1:10000)
